# Supplementary material for: Nano-bio-computing lipid nanotablet
Source: PubMed Central journal article supplement — Sci Adv. 2019 Feb 22;5(2):eaau2124. doi: 10.1126/sciadv.aau2124 (PMC6386558; doi:10.1126/sciadv.aau2124), 2019-02-22
Supplement: aau2124_SM.pdf [file aau2124_SM.pdf]

## Supplementary Materials for Nano-bio-computing lipid nanotablet

Jinyoung Seo, Sungi Kim, Ha H. Park, Da Yeon Choi, Jwa-Min Nam\*

\*Corresponding author. Email: [jmnam@snu.ac.kr](mailto:jmnam@snu.ac.kr)

Published 22 February 2019, *Sci. Adv.* **5**, eaau2124 (2019)

DOI: 10.1126/sciadv.aau2124

### The PDF file includes:

- Fig. S1. Conceptual illustrations of the LNT platform.
- Fig. S2. Characterization of nanoparticles.
- Fig. S3. Diffusion of nanoparticles tethered to an SLB.
- Fig. S4. Design and implementation of a Disassembly YES gate.
- Fig. S5. Tethering of nanoparticles to an SLB.
- Fig. S6. Image analysis pipeline.
- Fig. S7. Scattering signal profiles of red, green, and blue nanoparticles.
- Fig. S8. Nucleotide-level schematics of two-input logic gates.
- Fig. S9. Design principles for nanoparticle logic gates.
- Fig. S10. Modularity of a hairpin-based two-input Assembly AND gate.
- Fig. S11. Uneven responses of a two-input Disassembly OR gate.
- Fig. S12. A dual-rail NAND gate.
- Fig. S13. Disassembly INHIBIT and six-input Disassembly gates.
- Fig. S14. Complex multi-input Disassembly gates.
- Fig. S15. Dark-field snapshots of two-layer AND-AND and AND-OR cascade circuits.
- Fig. S16. Two-layer OR-AND and INHIBIT-AND cascade circuits.
- Fig. S17. A two-layer OR-OR cascade circuit.
- Fig. S18. A nanoparticle multiplexer circuit.
- Fig. S19. Effect of DNA concentration on floater diffusion.
- Table S1. Response rates of two-input logic gates.
- Table S2. DNA sequences of thiolated strands used for functionalizing nanoparticles.
- Table S3. DNA sequences and experimental conditions used in circuit operations.
- Legends of Movies S1 to S13
- Reference (47)

### Other Supplementary Material for this manuscript includes the following:

(available at [advances.sciencemag.org/cgi/content/full/5/2/eaau2124/DC1](https://advances.sciencemag.org/cgi/content/full/5/2/eaau2124/DC1))

Movie S1 (.mp4 format). Time-lapse dark-field imaging of a nanoparticle Assembly YES gate.

Movie S2 (.mp4 format). Time-lapse dark-field imaging of a nanoparticle Disassembly YES gate.

Movie S3 (.mp4 format). Receptor-only visualization of a dark-field movie.

Movie S4 (.mp4 format). Time-lapse dark-field imaging of a two-input Assembly AND gate.

Movie S5 (.mp4 format). Time-lapse dark-field imaging of a two-input Assembly OR gate.

Movie S6 (.mp4 format). Time-lapse dark-field imaging of a two-input Disassembly AND gate.

Movie S7 (.mp4 format). Time-lapse dark-field imaging of a two-input Disassembly OR gate.

Movie S8 (.mp4 format). Time-lapse dark-field imaging of a two-input Disassembly INHIBIT gate.

Movie S9 (.mp4 format). Time-lapse dark-field imaging of a six-input Disassembly gate.

Movie S10 (.mp4 format). Time-lapse dark-field imaging of a two-input Disassembly AND gate with three outputs.

Movie S11 (.mp4 format). Time-lapse dark-field imaging of a two-layer AND-AND cascade circuit.

Movie S12 (.mp4 format). Time-lapse dark-field imaging of a two-layer AND-OR cascade circuit.

Movie S13 (.mp4 format). Time-lapse dark-field imaging of a nanoparticle multiplexer circuit.

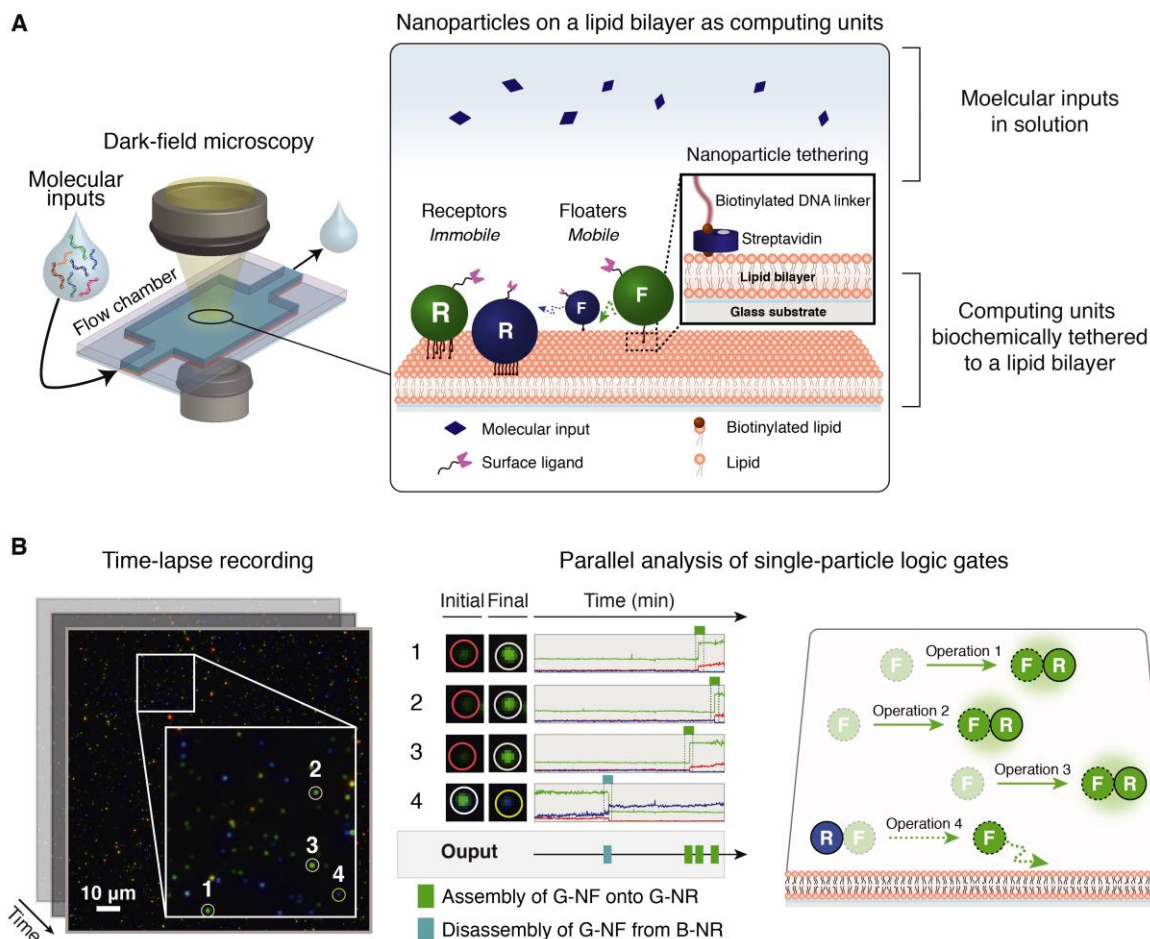

**Fig. S1. Conceptual illustrations of the LNT platform.** A lipid nanotablet (LNT) takes molecules as inputs and performs nanoparticle logic computation via nanoparticle networks tethered to its supported lipid bilayer, inducing dynamic assembly/disassembly reactions of nanoparticles as outputs. The plasmonic nanoparticles act as computing units and provide *in situ* optical readout as outputs that are readily readable and analyzable by dark-field microscopy (DFM). (A) Supported lipid bilayers as chemical circuit boards for nanoparticle computation. In LNT platform, the nanoparticle logic units are tethered to the lipid bilayer surface via strong interaction between biotinylated DNA linkers on the nanoparticle surfaces and streptavidins bound to biotinylated lipid molecules. On a lipid bilayer, receptor nanoparticles (R) are immobile due to a large number of surface DNA linkers that strongly interact with the lipid surface, and floater nanoparticles (F) are freely diffusible due to low linker density. Depending on the scattering signals of core nanoparticles, receptors are referred to as red nano-receptors (R-NRs), green nano-receptors (G-NRs), or blue nano-receptors (B-NRs). Similarly, floaters are referred to as red nano-floaters (R-NRs), green nano-floaters (G-NFs) or blue nano-floaters (B-NFs). Receptors and floaters serve as logic gates, processing the molecular information in solution using their programmable, stimuli-responsive surface ligands. Once nanoparticle logic gates are integrated on the lipid bilayer “chip”, solutions such as wash buffer and those containing nanoparticle gates or molecular inputs can be exchanged without perturbing the tethered particles. In addition, the dark-field imaging can be performed during the solution exchange *in situ*. (B) Parallel, single-particle analysis of nanoparticles by DFM. On LNT platform, multiple nanoparticle logic gates can be analyzed in parallel as long as each logic gate generates a spectrally distinct optical signal as an output. Several logic gates can be readily designed to generate distinct optical signals because plasmonic coupling-induced changes in a nanoparticle scattering signal depend on the combinations of receptor–floater pair involved in the interaction (36). A simple example of parallel, single-particle analysis on LNTs is illustrated. In this example, an Assembly logic gate is composed of a G-NR and a G-NF, and a Disassembly logic gate is composed of a B-NR and a G-NF. The two output signals of the two logic gates, an increase in green intensity of a G-NR (by association with a G-NF) and a decrease in the green intensity of a B-NR (by dissociation with a G-NF), are readily discernible. Thus, the two gates can be executed simultaneously.

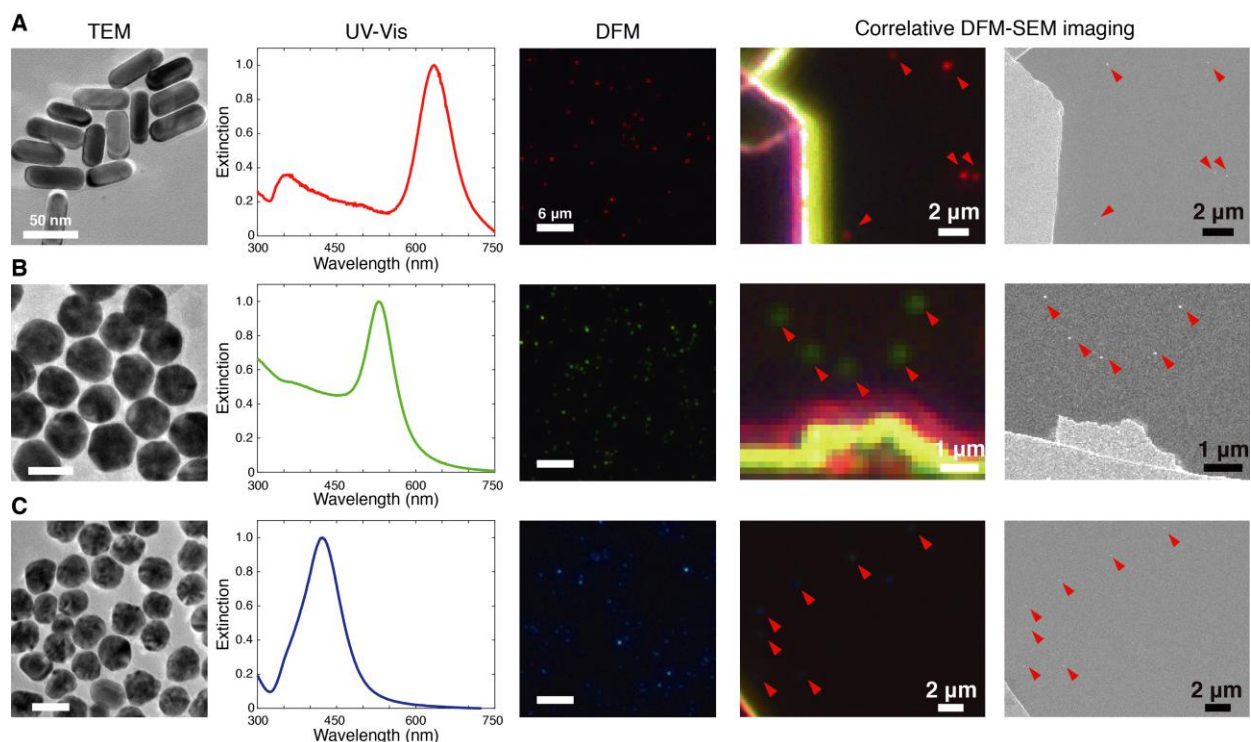

**Fig. S2. Characterization of nanoparticles.** (A) Gold nanorods with silver shells (diameter =  $22.2 \pm 1.2$  nm, length =  $55.9 \pm 2.9$  nm, aspect ratio = 2.5) that serve as core red nanoparticles for R-NRs and R-NFs. (B) Gold nanospheres (diameters =  $50.0 \pm 1.8$  nm) used as core green particles for G-NRs and G-NFs. (C) Silver nanospheres with gold seeds (diameters =  $54.8 \pm 3.1$  nm) that function as core blue particles for B-NRs and B-NFs. First column: transmission electron microscopy images. Second column: extinction spectra obtained by an ultraviolet–visible spectrophotometer. The three spectra were normalized to 1 OD. Third column: DFM images of nanoparticles tethered to a supported lipid bilayer. Fourth and fifth columns: Correlative DFM-SEM imaging for single-nanoparticle scattering signal analysis. Nanoparticles on a Cr-patterned glass substrate were first imaged by DFM, coated with Pt, and imaged in the same position by FE-SEM. As nanoparticles exhibit plasmonic coupling effect when the two nanoparticles are located in a close distance, we could determine whether a bright spot is from a single particle or an aggregation. The SEM images taken in the same positions (right) show that bright spots captured in the DFM images (left) are from single nanoparticles.

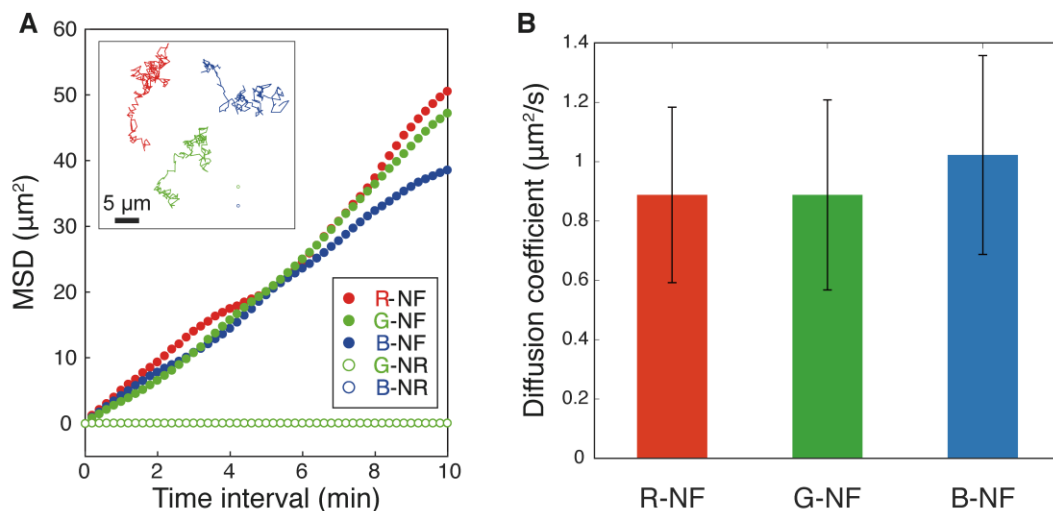

**Fig. S3. Diffusion of nanoparticles tethered to an SLB.** (A) Mean square displacement (MSD) versus time plots of the five representative diffusion trajectories (inset). The MSD plots of the three mobile floaters, R-NFs, G-NFs, and B-NFs, showed a linear relationship that confirmed their two-dimensional Brownian motions. The MSD plots of G-NRs and B-NRs confirmed their immobility. (B) Average diffusion coefficients of the diffusive R-NF ( $N = 154$ ), G-NF ( $N = 194$ ), and B-NFs ( $N = 247$ ). Error bars indicate standard deviations.

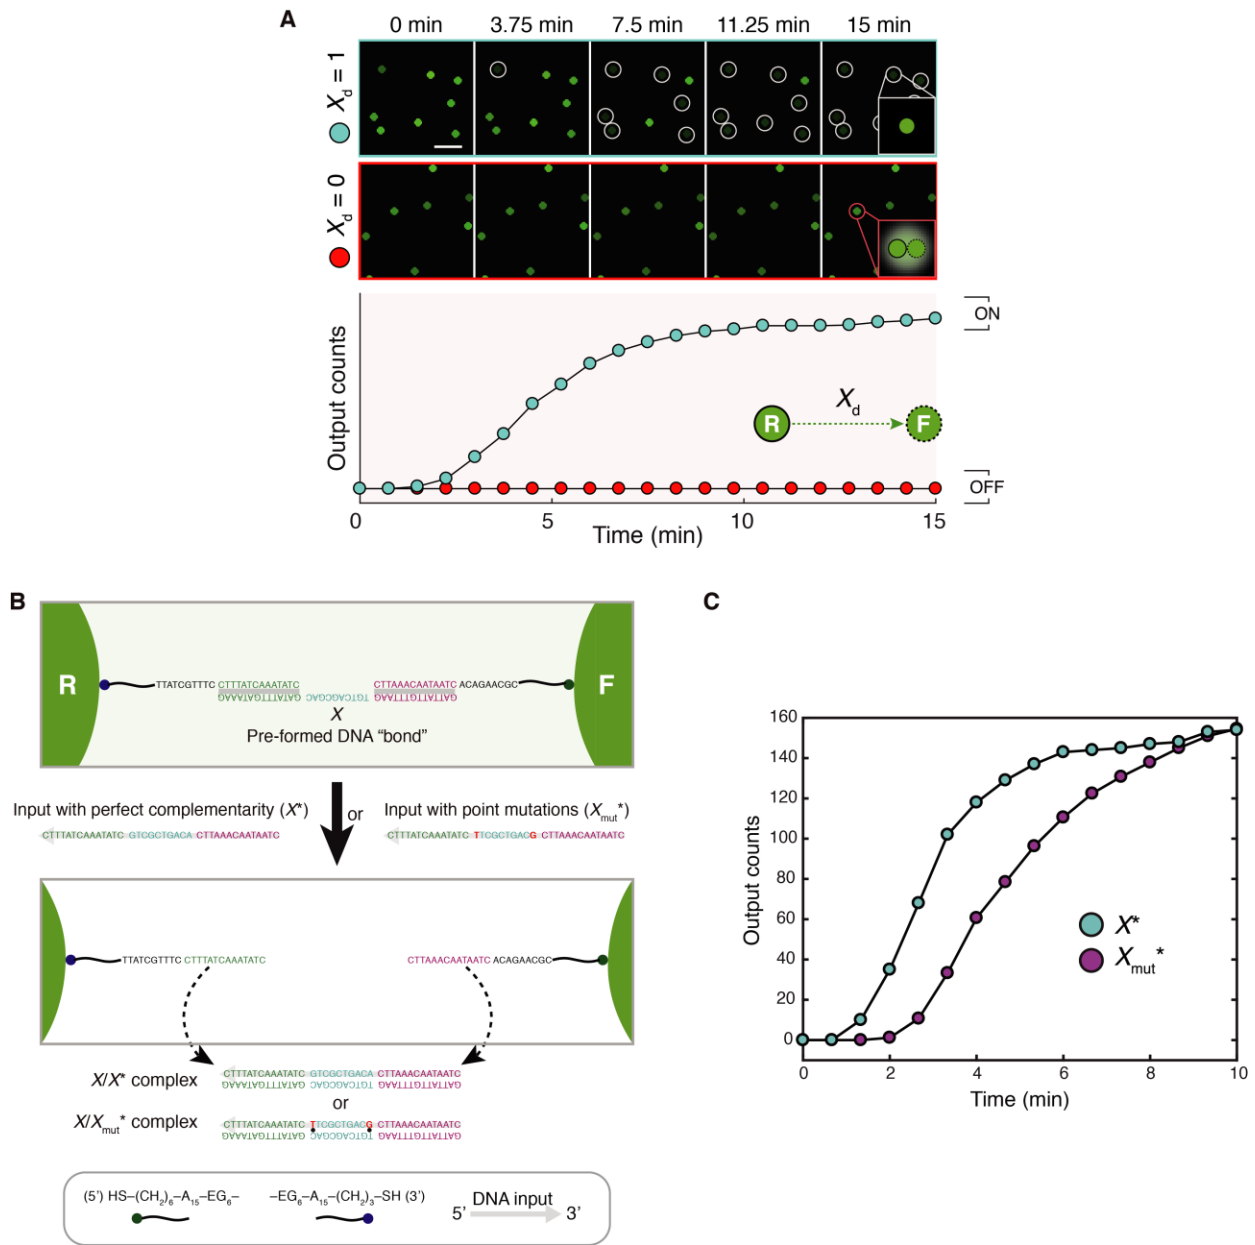

**Fig. S4. Design and implementation of a Disassembly YES gate.** (A) DNA-mediated disassembly reactions captured by DFM imaging. Inputs were added after pre-dimerization. G-NFs are released from G-NRs only when a disassembly input  $X_d$  (in Fig. 1C) is present in solution. The disassembly events were cumulatively counted as outputs of the Disassembly YES gate. The time-versus-output plot indicates that the population of Disassembly YES gate switches into ON state in response to  $X_d$ . (B) Nucleotide-level illustrations of a Disassembly YES gate responding to a fully complementary input ( $X^*$ ) and a mismatched input ( $X_{mut}^*$ ). Two point mutations at both ends of the toehold domain (A to G, G to T) and mismatched base pairings are highlighted. (C) Kinetics analysis. Fully complementary and mismatched inputs are shown in cyan and magenta, respectively. Due to the high concentration (500 nM) of input and long toehold domain, equilibrium is pushed toward disassembly even in the presence of base mismatches. As a result, responses under both conditions were saturated after sufficient operation time. However, the fully complementary input induced faster response of the disassembly gate than the mismatched input, which indicated that the system could potentially discriminate mismatched inputs under certain conditions. EG denotes an ethylene glycol unit. Asterisks denote complementarity.

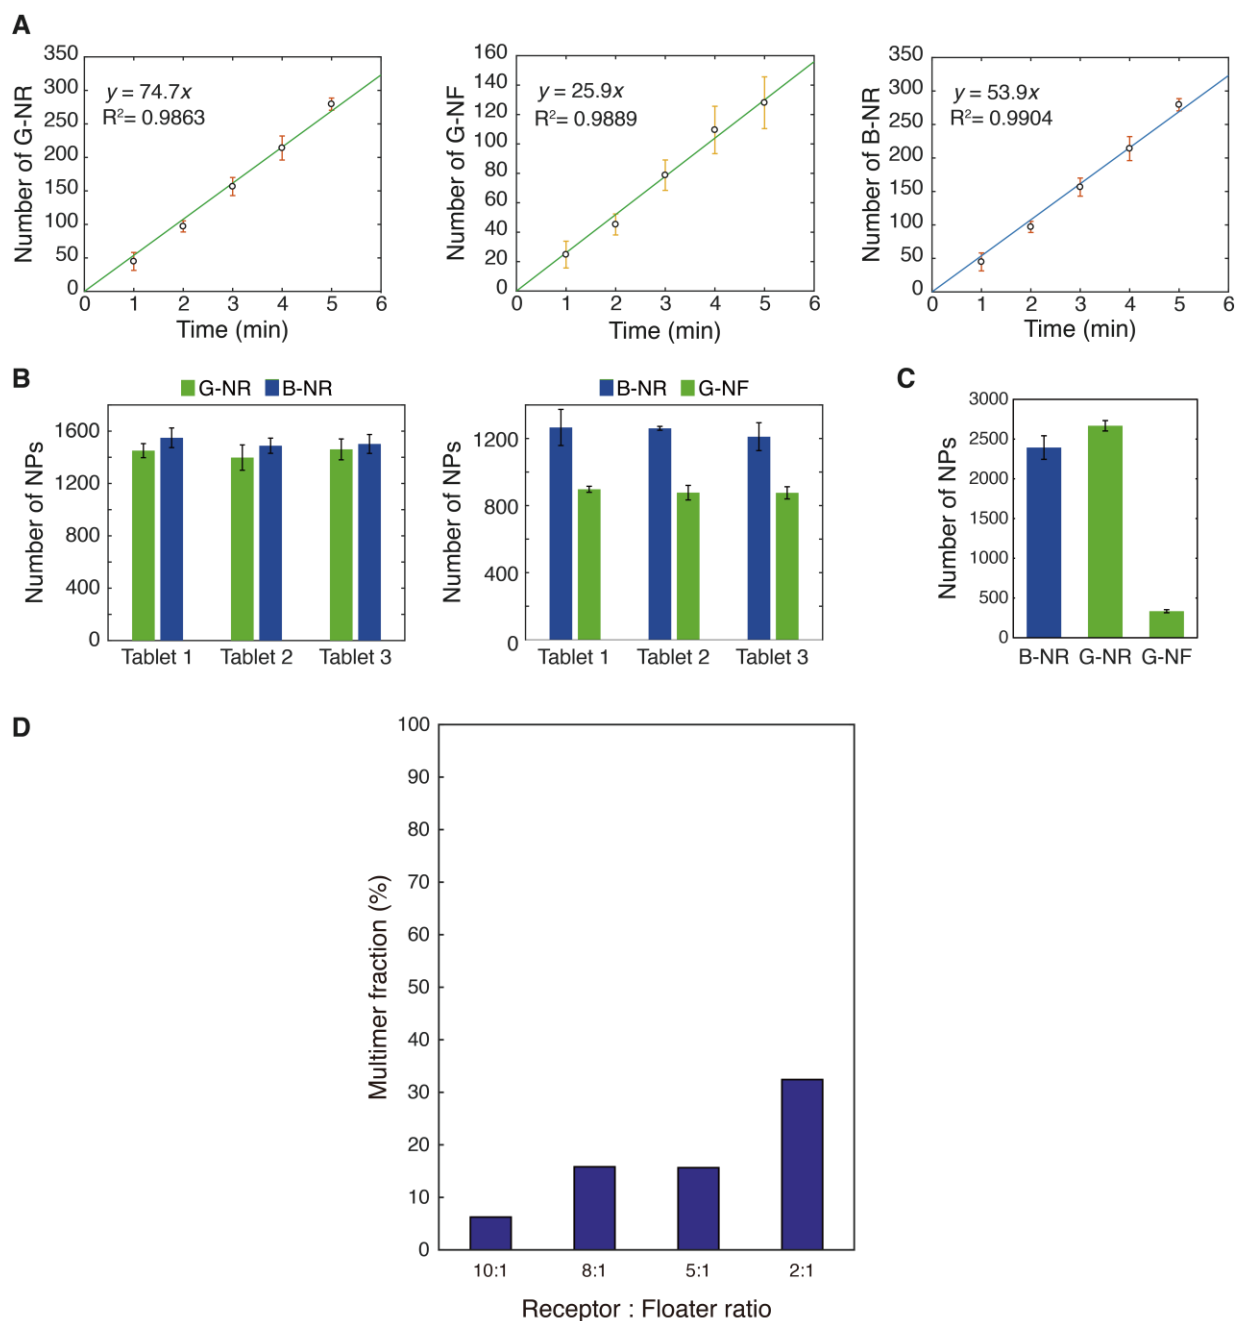

**Fig. S5. Tethering of nanoparticles to an SLB.** (A) The number of nanoparticles (NPs) tethered to a supported lipid bilayer versus incubation time plots. Tethering of 2.5 pM G-NR (left), 2.6 pM G-NF (center) and 2.2 pM B-NR (right). The number of NPs at each time point was counted in an area of  $90 \times 90 \mu\text{m}^2$  at four different positions. Error bars indicate standard deviations calculated based on the particle numbers counted at the four positions. The plots showed that the number of tethered particles is linearly proportional to the time during which a lipid bilayer chamber is incubated with the solution containing biotinylated NPs ( $R^2 > 0.98$ ). The plots also revealed that tethering of receptors is faster than tethering of floaters, as expected from the high linker density of the receptors. This linear relationship allowed accurate control of NP density on lipid bilayers. We also observed that the NPs loaded in the linear range were in better quality; floater particles were more mobile, and less aggregation of NPs was observed. We speculate that NPs could non-specifically bind to a lipid bilayer when incubation time is too long (beyond the linear range). (B) The number of tethered NPs in three replicate flow chambers (i.e. tablets). Tethering of G-NRs and B-NRs (left), and B-NRs and G-NFs (right). For each tablet, the number of NPs was counted in an area of  $90 \times 90 \mu\text{m}^2$  at four different positions after the tethering. Error bars indicate standard deviations calculated based on the particle

numbers obtained from the four different positions. The tablet-to-tablet variability in particle numbers was negligible. (C) The number of three different NPs (B-NRs, G-NRs, and G-NFs) measured at four different positions in a flow chamber. Error bars indicate standard deviation calculated based on the number of NPs obtained from the four different positions. These results demonstrate that the tethering of NPs on a lipid nanotablet is controllable and robust across the large area of lipid bilayers, regardless of nanoparticle types and mobility. The typical population density used in this study was approximately 3,700 receptors and 300 floaters per  $180 \times 180 \mu\text{m}^2$ . This optimum density was chosen because (i) it was desirable to observe at least 300 binding or unbinding events within 30 min and (ii) at a higher density signal overlaps compromised the accuracy of the image analysis. (D) Degree of multimer-forming reactions estimated by MATLAB-based simulation. Assembly reactions of SLB-tethered NPs were modeled and simulated using MATLAB. This computational approach was developed to estimate how a receptor/floater ratio affects the degree of multimer formation. In the model, a given number of receptors and floaters were randomly dispersed in an area of  $128 \times 128 \mu\text{m}^2$  with the periodic boundary conditions. The total number of NPs in the area was set to be 1,800. Diffusion constants of floaters were assigned to have a normal distribution with mean  $0.9 \mu\text{m}^2/\text{s}$  and standard deviation of  $0.3 \mu\text{m}^2/\text{s}$ . This approximation is based on the experimental data on diffusion profiles of floaters shown in fig. S3. We assumed that the diffusion of floaters is governed by a two-dimensional random walk, where the step size for each floater is  $\sqrt{4Dt}$  with  $t = 5$  ms. Positions of receptors were fixed. To run the simulation efficiently, floaters were set to diffuse on two-dimensional square lattice with cell edge that was equal to the diameter of particle cross section. The binding events between a receptor and a floater occur with the probability of 0.3 for each collision. In the simulation, “collision” is defined as an event that occurs when a coordinate of a floater overlaps with that of a receptor. For multimer formation processes, lower binding probabilities (0.18 for trimer formation and 0.09 for tetramer formation) were used because the addition of another floater to a receptor–floater dimer and a trimer is sterically less favored than the addition of a floater to a receptor (47). The scaling factor was introduced based on the geometrical constraints. The fraction of floaters that formed multimers (trimers or tetramers) in simulated assembly reactions for a given receptor/floater ratio was estimated using MATLAB-based simulation. Under 10:1, 8:1, 5:1, and 2:1 receptor/floater ratios, 6%, 15%, 15%, and 34% of floaters ended up forming multimers, respectively.



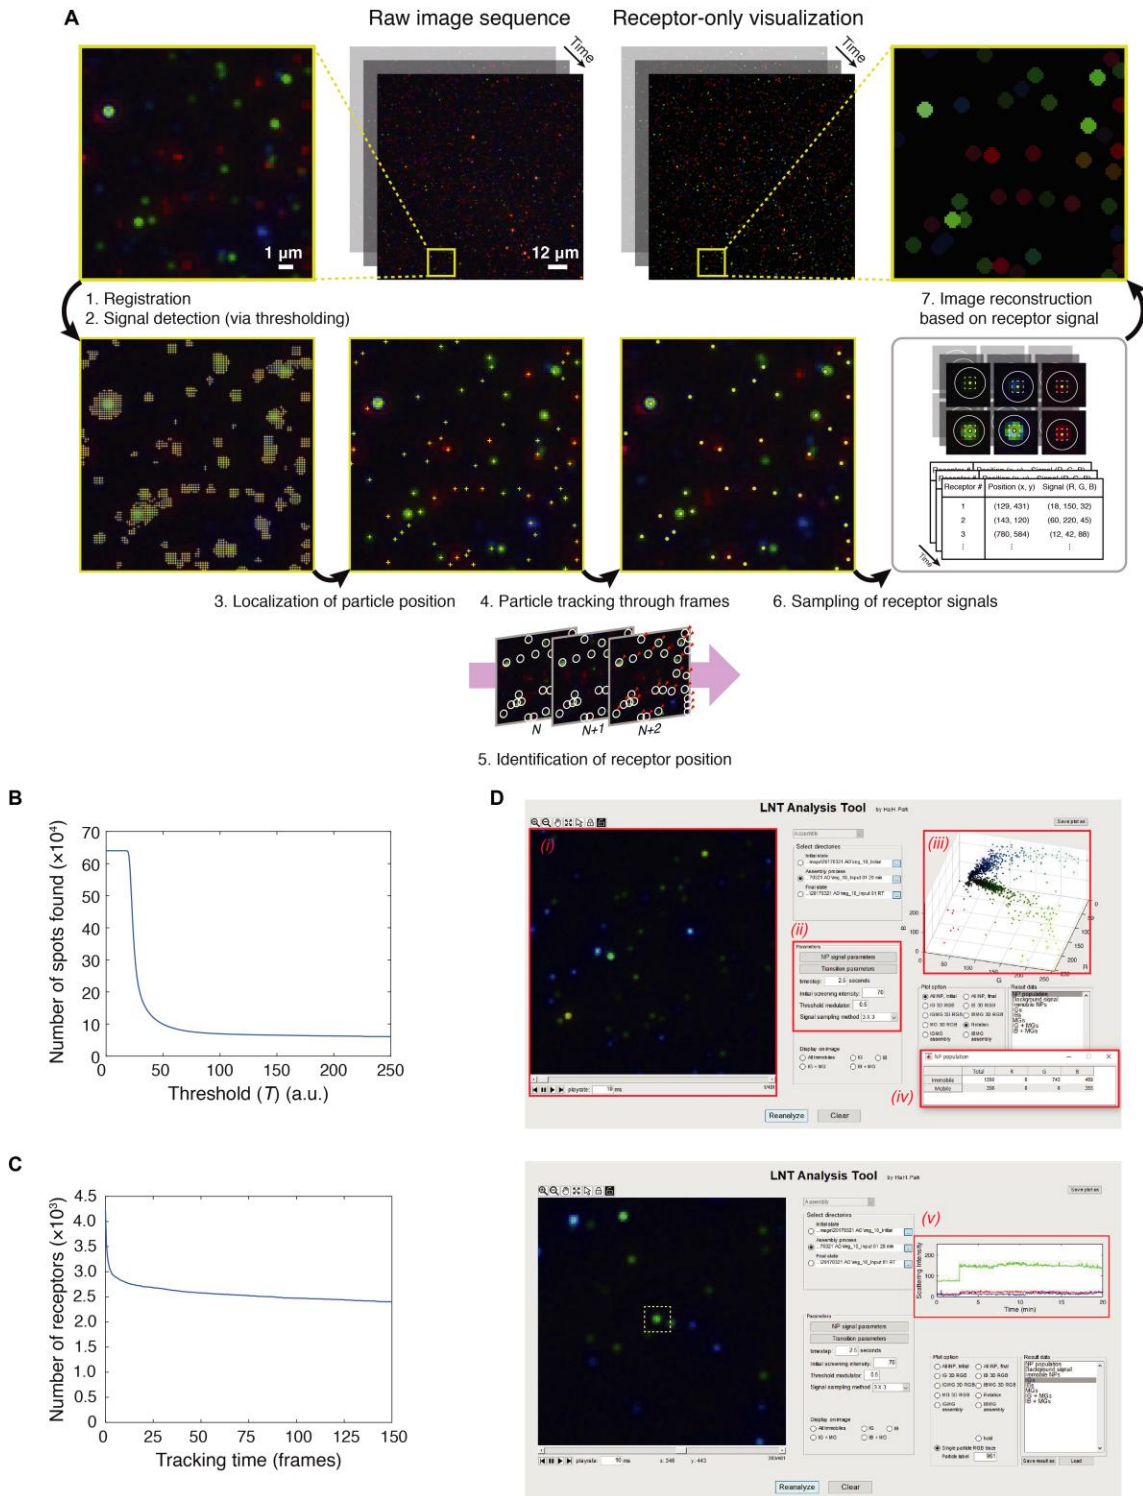

**Fig. S6. Image analysis pipeline.** (A) Single-particle tracking algorithm for the analysis of time-lapse DFM images. After image registration (step 1), pixels with signal intensities higher than a detection parameter are detected and marked with yellow crosses (step 2). The detection parameter ( $d$ ) is specific to each dark-field movie because types and populations of nanoparticles on each tablet affect the background signal of the movie. In our analysis,  $d$  is defined as:  $d = m_{background} + 0.5 \times \sigma_{background}$ , where  $m_{background}$  and  $\sigma_{background}$  are average and standard deviation of the pixels whose gray scale intensities are below a chosen threshold  $T$ . The boundaries of the detected signals (pixels) are readily distinguishable. It was assumed that the segmented signals are from nanoparticles. Centers of the segmented signals are localized to provide the positions of the nanoparticles (step

3). The localized particles are marked with yellow crosses. Receptors are identified by comparing the localized positions through frames (step 4). Particles whose positions remained unchanged for entire imaging duration are identified as receptors and marked with yellow dots (step 5). For each receptor, a signal intensity is sampled and averaged from a  $3 \times 3$  pixel window that is marked with a white dotted box. Visualizing only receptor signals in the dark background yields a “receptor-only” dark-field image sequence. **(B)** The number of detected signals plotted as a function of the threshold  $T$ . The presence of a plateau suggests that there is a condition over which the number of identified signals is insensitive to the threshold value  $T$  chosen for the analysis. **(C)** The number of receptors plotted as a function of the tracking frame. The presence of a plateau indicates that the number of identified receptors is insensitive to the particular tracking length chosen for the analysis. We chose 70 (a.u.) as a threshold  $T$  and 31 (frames) as a tracking length. Positions and signals of receptors in the raw dark-field image sequence movie correspond very well with those identified by the algorithm (movie S3). The comparison also shows that the algorithms reliably differentiate receptors from floaters in the high-density setting. **(D)** MATLAB-based graphical user interface for analyzing nanoparticle logic gates on LNTs. This program has the following features: (i) a raw dark-field image sequence uploaded for the analysis, (ii) a control panel for analysis parameters (e.g., threshold, signal sampling method, and transition parameter), (iii) a visualization of detected receptor signals in three-dimensional (3D) space of a red-green-blue (RGB) intensity scatter plot (i.e. 3D signal profile), (iv) the number of receptors (R-NR, G-NR, and B-NR) and floaters (R-NF, G-NF, and B-NF) detected from the input image sequence, and (v) a time trace of a selected receptor signal (marked with a yellow dotted box).

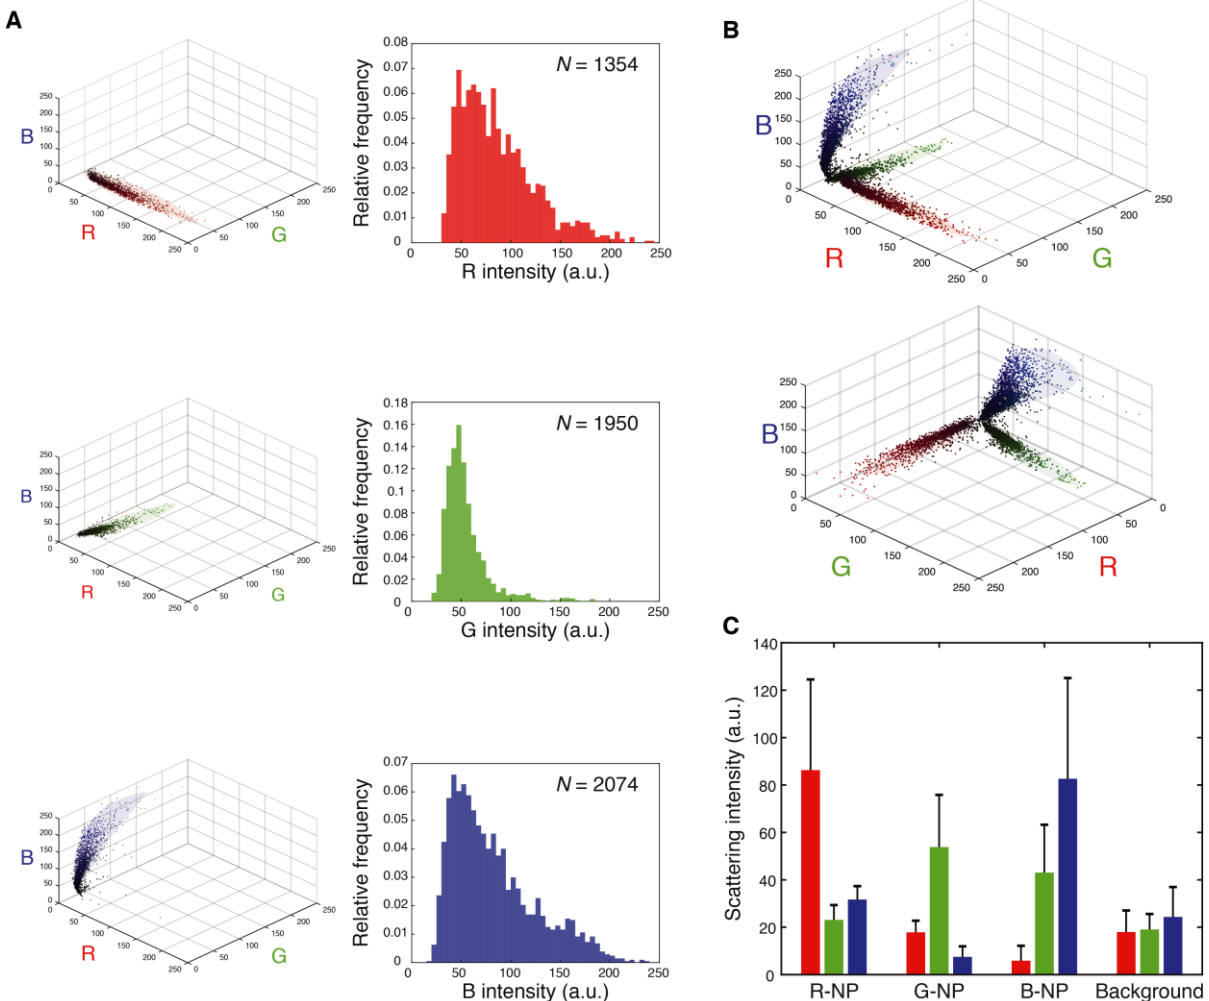

**Fig. S7. Scattering signal profiles of red, green, and blue nanoparticles.** (A) RGB intensity scatter plot of red nanoparticles (R-NPs, upper), green nanoparticles (G-NPs, middle), and blue nanoparticles (B-NPs, lower) in RGB signal space. The background of each cluster is marked with its corresponding color to allow the clusters to be easily distinguishable from each other. (B) RGB scattering signals from R-NPs, G-NPs, and B-NPs are visualized together in the RGB signal space. The visualization shows three signal clusters with minimal overlap. The scattering signals from the red, green, and blue nanoparticles are readily distinguishable from each other. (C) Average red, green, and blue scattering intensities of the nanoparticles and background signals are represented with red, green, and blue bars. Error bars indicate standard deviations. The signal profiles of the three core nanoparticles were obtained by the image analysis algorithm (described in fig. S6) and used in identifying and classifying logic-gated nanoparticle reactions.

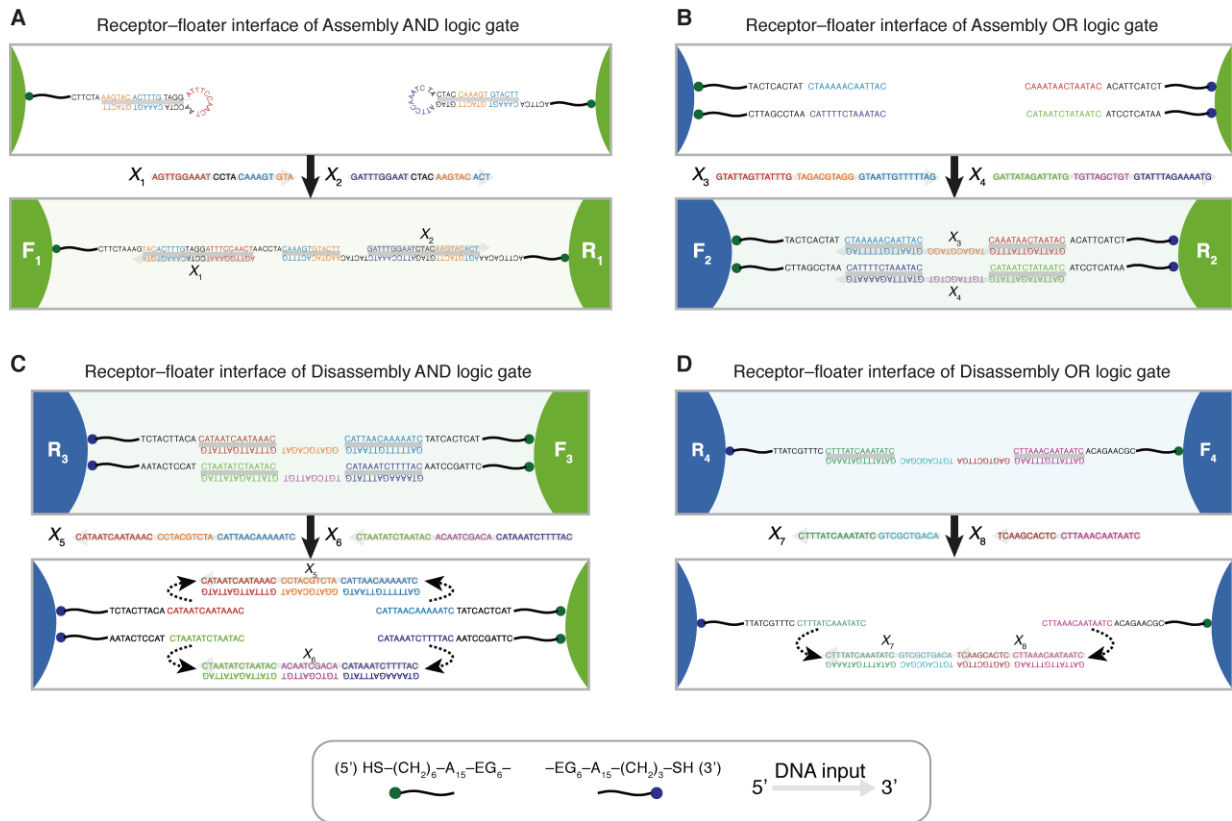

**Fig. S8. Nucleotide-level schematics of two-input logic gates.** (A) Two-input Assembly AND gate. (B) Two-input Assembly OR gate. (C) Two-input Disassembly AND gate. (D) Two-input Disassembly OR gate. The sequence-level illustrations show how the gates respond to molecular inputs. EG denotes an ethylene glycol unit.

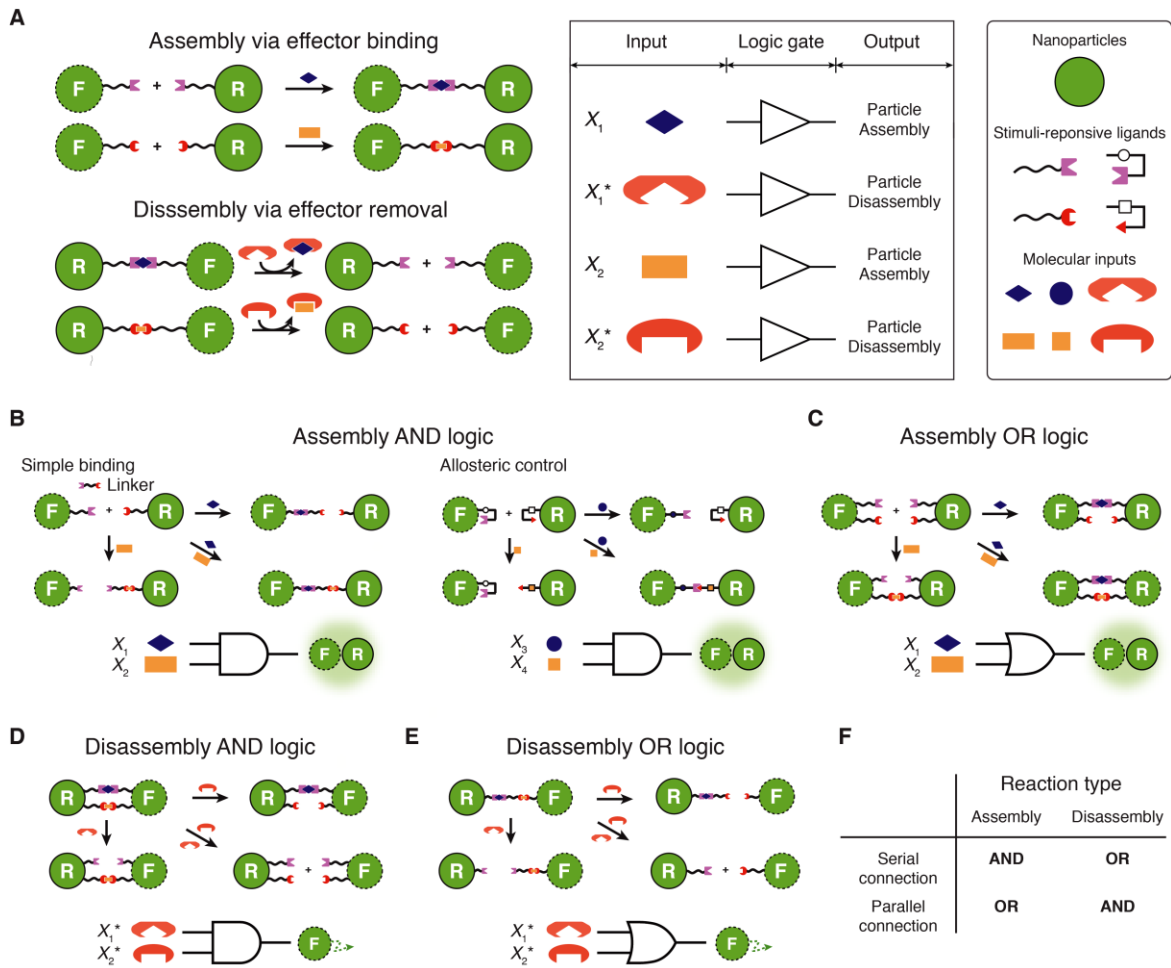

**Fig. S9. Design principles for nanoparticle logic gates.** (A) Graphical summary of the generalizable concept. Illustration of effector-mediated nanoparticle Assembly/Disassembly YES gates (left) and truth table for the concept (right) are provided. Selective effector-ligand pair and effector-chelator pair are required for construction of Assembly/Disassembly logic gates. To build a logic gate using two nanoparticles, “bonding” interactions in the receptor–floater interface need to be programmed in such a way that the bonds are formed (via assembly) or cleaved (via disassembly) only if two molecular inputs satisfy AND or OR logic. (B) Two-input Assembly AND gate. (C) Two-input Assembly OR gate. Assembly reactions are controlled by AND logic when the bond-forming interaction require the *serial* activation by the two inputs and by OR logic when the bond-forming interaction is controlled in *parallel*. (D) Two-input Disassembly AND gate. (E) Two-input Disassembly OR gate. Similarly, Disassembly reactions are modulated by AND logic via parallel disconnection and by OR logic via serial disconnection. (F) Table summary. These illustrations describe the generalized concept of the interface programming. In this study, we used sequence recognition and strand displacement of DNA as the mechanisms to implement the logic. Specifically, we used single-stranded DNA molecules as effectors, thiolated oligonucleotides as ligands, and a strand displacement as chelation mechanism. We foresee that this design rules can be potentially applied to other ligand systems and core nanostructures.

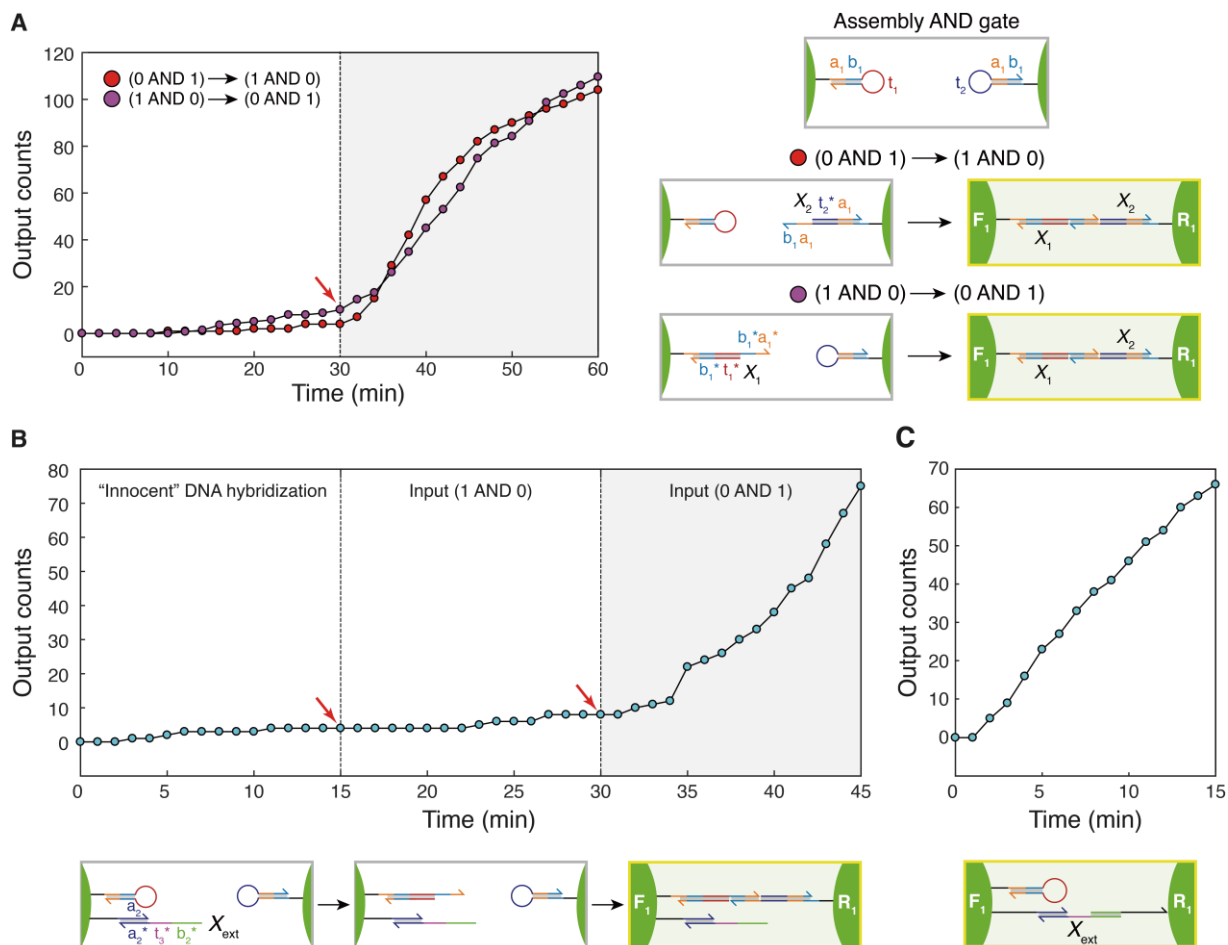

**Fig. S10. Modularity of a hairpin-based two-input Assembly AND gate.** (A) Sequential activation of the two-input Assembly AND gate (described in Fig. 2A and fig. S8A). The responses of the Assembly AND gate to sequentially introduced inputs (Red:  $X_2$  addition followed by  $X_1$  addition. Magenta:  $X_1$  addition followed by  $X_2$  addition). Two hybridization events are all required to induce assembly reactions between  $R_1$  and  $F_1$ . (B) Operation of the Assembly AND gate after hybridization by an “innocent” DNA input  $X_{\text{ext}}$  that interacts with a non-hairpin ligand on  $F_1$ . The hairpin-based assembly is insensitive to other hybridization events on the same particle. (C) Assembly by the DNA input  $X_{\text{ext}}$ . The assembly by the simple hybridization (as in Assembly YES gate) is insensitive to the presence of hairpin ligands on the same particle. In addition to the time-versus-output plots, domain-level illustrations are provided. DNA sequences and experimental conditions are listed in tables S2 and S3.

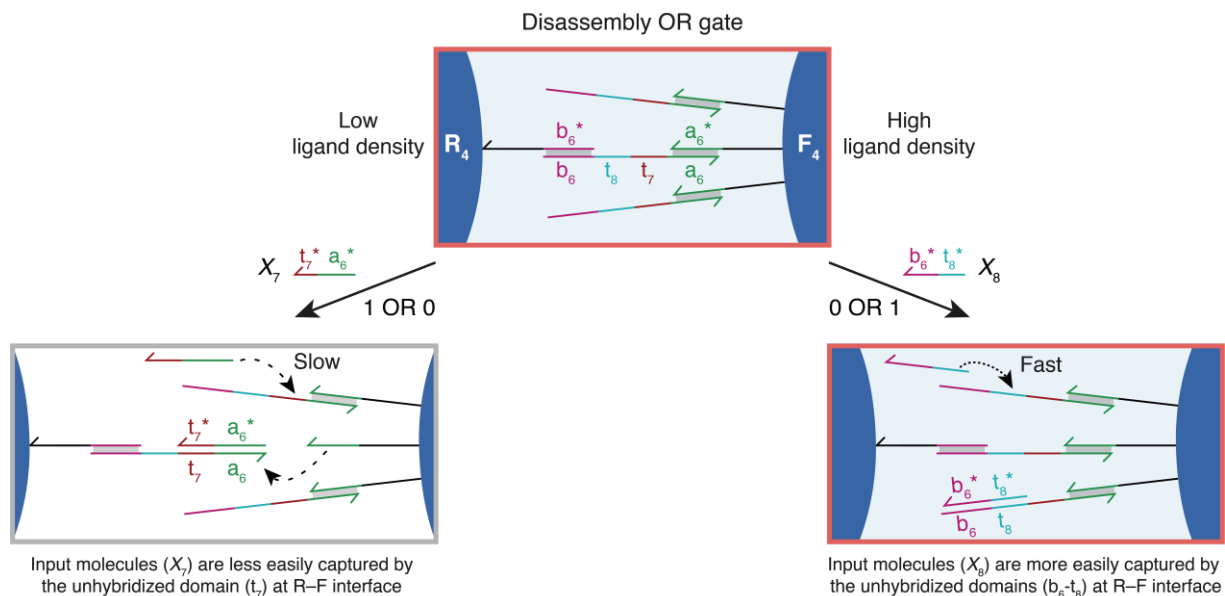

**Fig. S11. Uneven responses of a two-input Disassembly OR gate.** We speculate that the higher response rate under 1 OR 0 condition than the response rate under 0 OR 1 condition is attributed to the higher density of surface ligands in  $F_4$  than in  $R_4$ . Due to its higher ligand density,  $F_4$  exposes more single-stranded domains ( $b_6-t_8-t_7$ ) than  $R_4$  after pre-dimerization. The exposed strands can interact with incoming input strands. In 0 OR 1 condition, interactions between the input  $X_8$  ( $b_6^*-t_8^*$ ) and the exposed bonds are more effective compared with those between the input  $X_7$  ( $a_6^*-t_7^*$ ) and the bonds in 1 OR 0 condition, mainly because the recognizable sequence is longer and more accessible for the former interaction. As a result, the input  $X_8$  is more easily trapped by the exposed strands without leading to effective strand displacements that induce particle disassembly. This interaction is an example of undesirable interactions that occur at particle–particle interfaces.  $R_4$ ,  $F_4$ ,  $X_7$ , and  $X_8$  are from Fig. 3D.

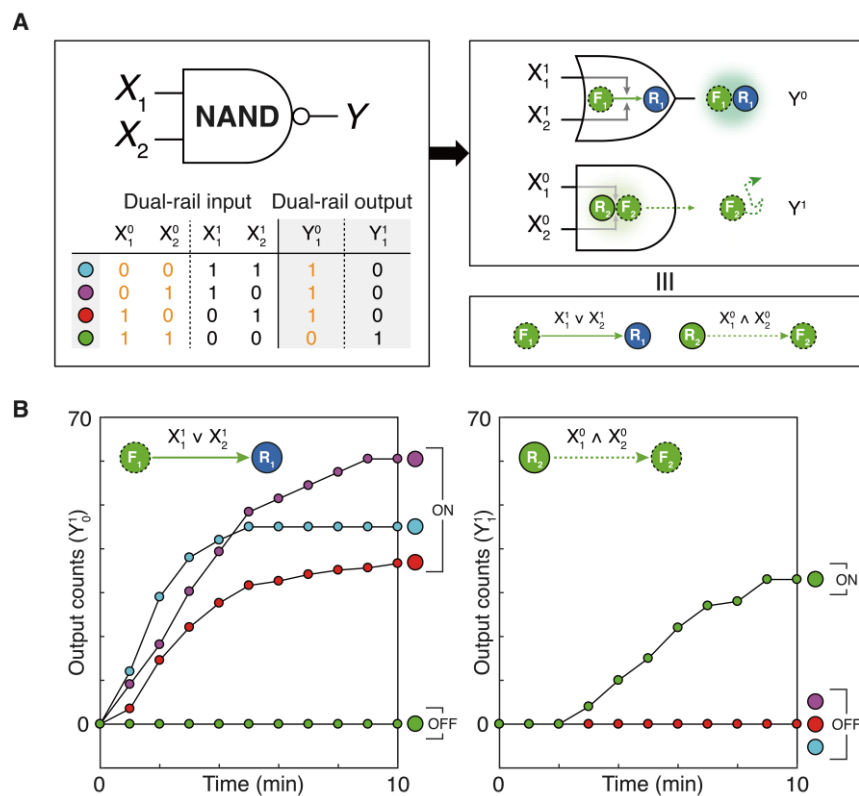

**Fig. S12. A dual-rail NAND gate.** (A) A two-input dual-rail NAND gate. Dual-rail inputs of  $X_i$  are represented as  $X_i^0$  and  $X_i^1$  (which denote logic FALSE and TRUE, respectively). Outputs were denoted by the same rule. A two-input Assembly OR gate ( $X_1^1$  OR  $X_2^1$ ) and a two-input Disassembly AND gate ( $X_1^0$  AND  $X_2^0$ ) are implemented in parallel to process dual-rail NAND logic. (B) Kinetics analysis. The two gates generate correct logic outputs without interfering with each other, providing ON/OFF levels over 37-fold ( $Y^0$ , two-input Assembly OR) and 33-fold ( $Y^1$ , two-input Disassembly AND). This result demonstrates the modularity of nanoparticle logic gates. DNA sequences and experimental conditions are listed in tables S2 and S3.

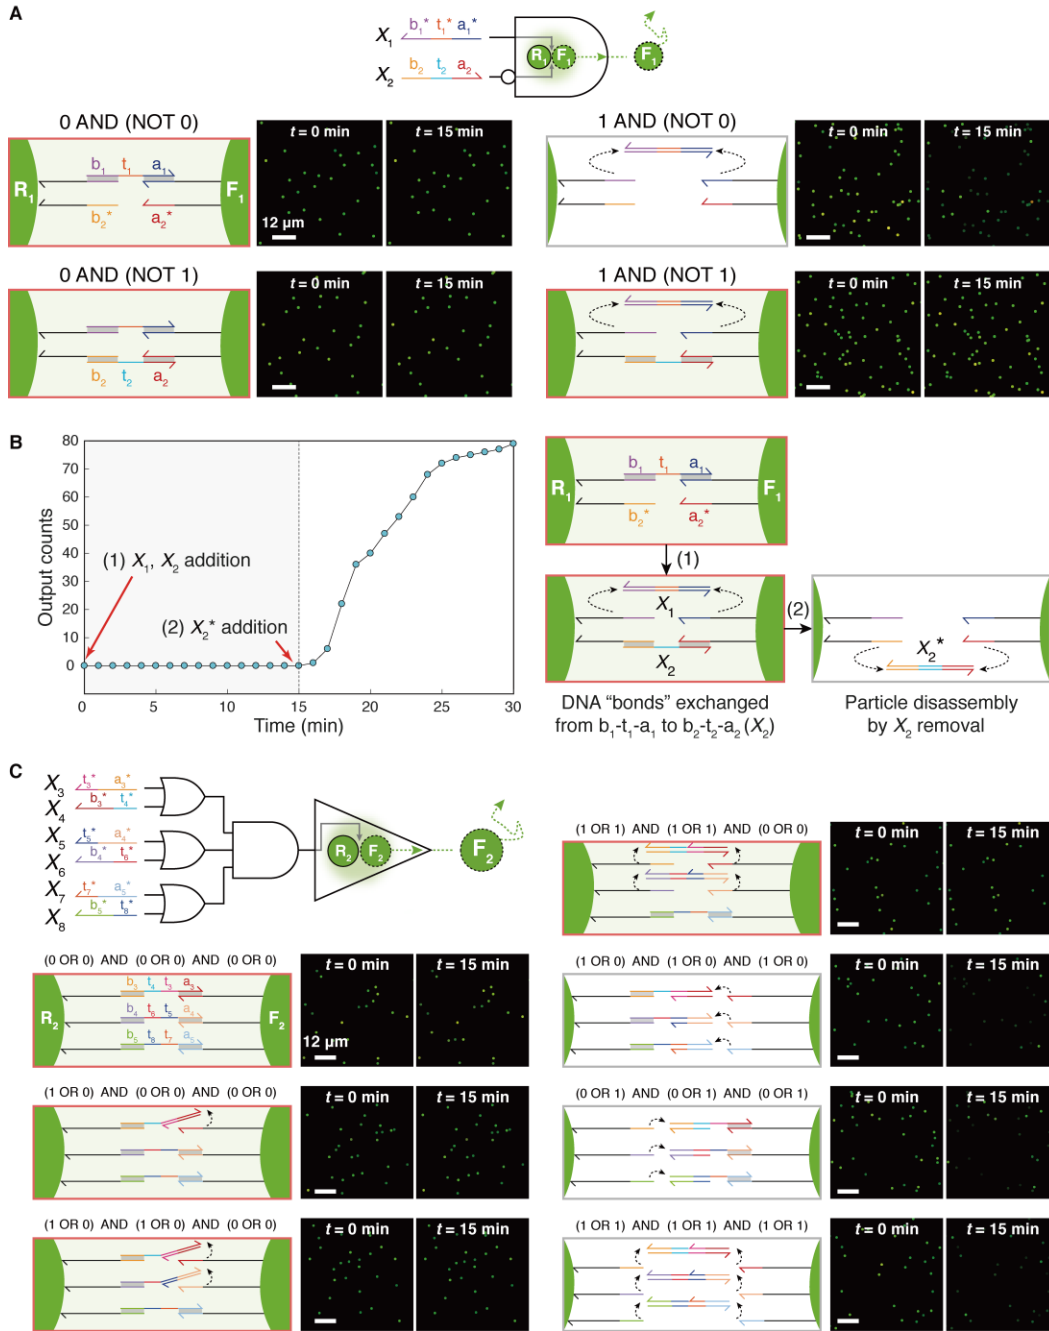

**Fig. S13. Disassembly INHIBIT and six-input Disassembly gates.** (A) Domain-level illustration (left) and reconstructed dark-field images (right) of a two-input Disassembly INHIBIT gate that evaluates  $X_1$  AND (NOT  $X_2$ ) logic. The reconstructed images provide only receptor signals. The disassembly reactions were observed only in the logical 1 AND (NOT 0) condition. (B) Characterization of strand displacement reactions in the Disassembly INHIBIT gate. According to the design, the DNA bond at an  $R_1$ – $F_1$  interface should change from  $b_1-t_1-a_1$  to  $b_2-t_2-a_2$  ( $X_2$ ) upon the addition of the two inputs  $X_1$  and  $X_2$ . If the bond exchange is effective at the receptor–floater interface, the disassembly reactions should occur upon the subsequent addition of  $X_2^*$ . The time-versus-output plot shows that the INHIBIT gate operates as designed. DNA sequences and experimental conditions are listed in tables S2 and S3. See also movie S8. (C) Domain-level illustrations (left) and reconstructed dark-field images of the six-input Disassembly gate that processes  $(X_3$  OR  $X_4$ ) AND  $(X_5$  OR  $X_6)$  AND  $(X_7$  OR  $X_8)$  logic. DNA sequences and experimental conditions are listed in tables S2 and S3. See also movie S9.



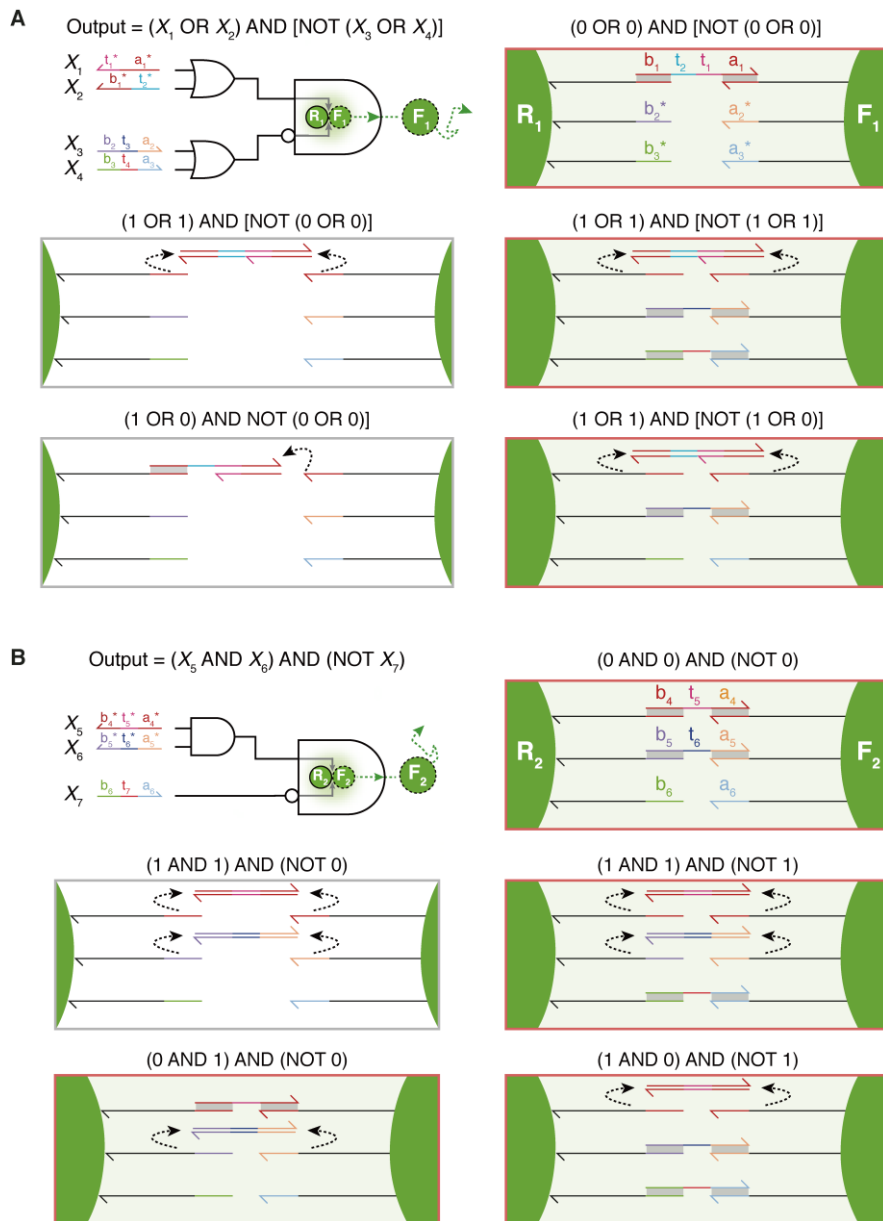

**Fig. S14. Complex multi-input Disassembly gates.** The approaches used to realize the INHIBIT logic and fan-in were combined to design Disassembly gates with more complex logic expressions. **(A)** A four-input Disassembly gate that processes  $(X_1 \text{ OR } X_2) \text{ AND } [\text{NOT } (X_3 \text{ OR } X_4)]$  logic expression. In this design, either  $X_1$  or  $X_2$  can cleave a DNA bond (in a pre-formed  $R_1$ – $F_1$  dimer) and either  $X_3$  or  $X_4$  can form a bond within the dimer. For disassembly of the dimer, bond cleavage reactions should proceed in the absence of  $X_3$  and  $X_4$ . **(B)** A three-input Disassembly gate that processes  $(X_5 \text{ AND } X_6) \text{ AND } (\text{NOT } X_7)$  logic. For disassembly of the dimer,  $X_5$  and  $X_6$  are required to remove the two different DNA bonds without additional bond formations by  $X_7$ .

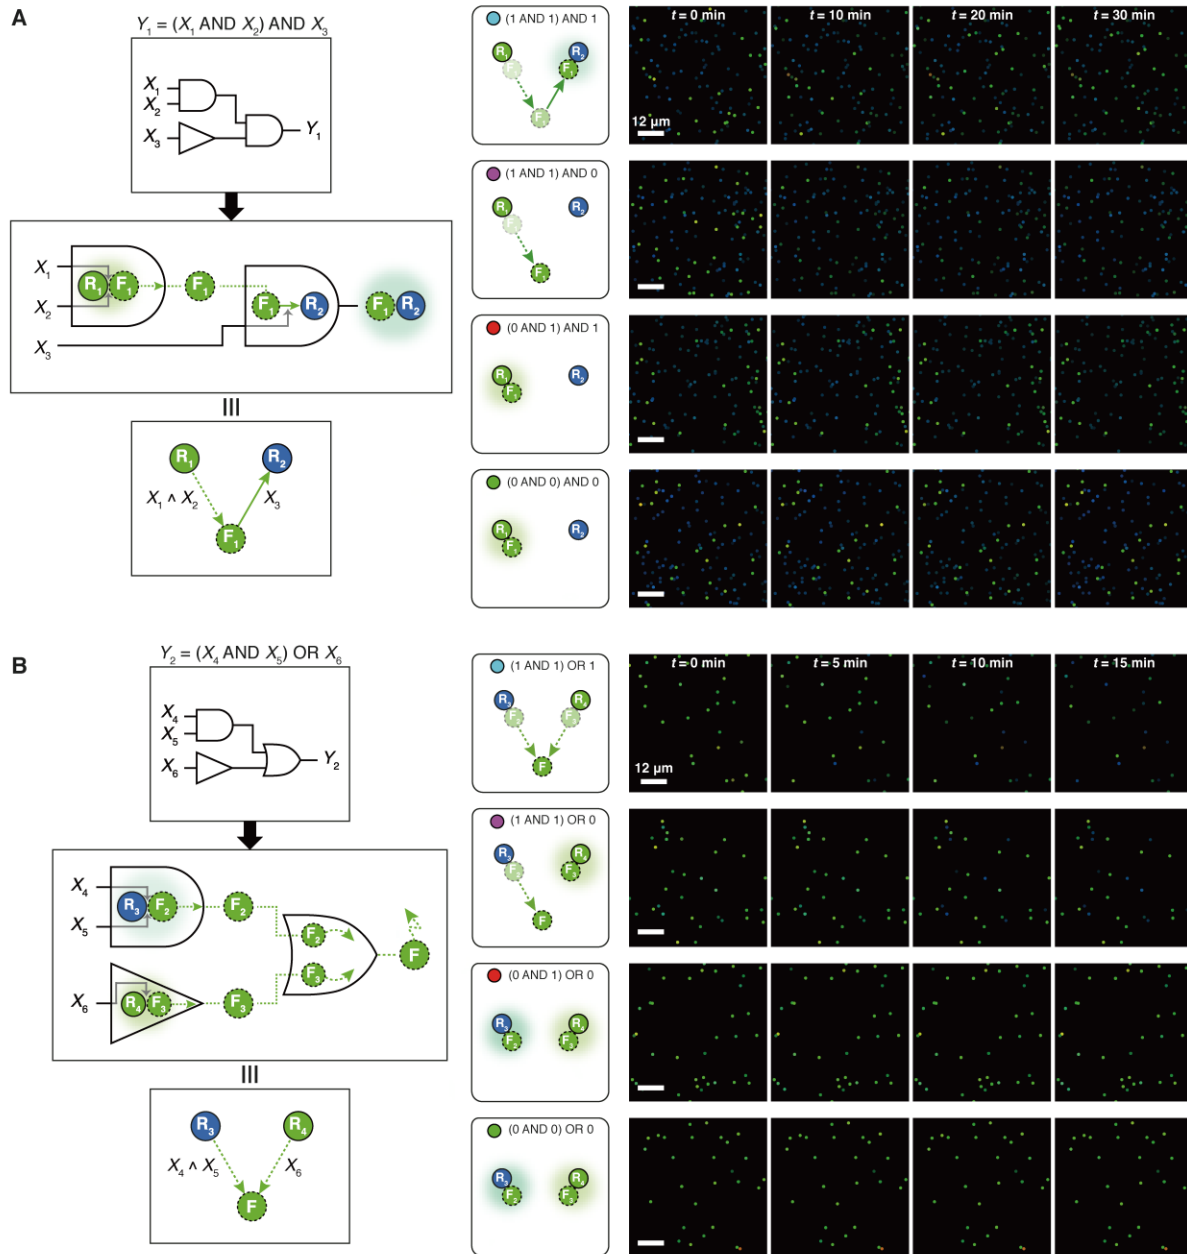

**Fig. S15. Dark-field snapshots of two-layer AND-AND and AND-OR cascade circuits.** (A) Two-layer AND-AND cascade circuit. The release of G-NFs (F<sub>1</sub>) from G-NRs (R<sub>1</sub>) is controlled by AND logic ( $X_1 \text{ AND } X_2$ ). The released F<sub>1</sub> can bind to R<sub>2</sub> only when the assembly input  $X_3$  is present. The final circuit output is controlled by the three-input logic expression  $(X_1 \text{ AND } X_2) \text{ AND } X_3$ . In the first condition (1 AND 1) AND 1, the green intensity decreases in R<sub>1</sub> and increases in R<sub>2</sub>, showing the successful cascading by the G-NFs (F<sub>1</sub>). In the second condition (1 AND 1) AND 0, only the decrease in green intensity is observed. The lack of signal increase indicates that the released floaters (F<sub>1</sub>) do not bind to other receptors. The bottom two conditions show no visible responses. See also movie S11. (B) Two-layer AND-OR cascade circuit. The release of G-NFs (F<sub>2</sub>) from B-NRs (R<sub>3</sub>) is controlled by AND logic ( $X_4 \text{ AND } X_5$ ), and the release of different G-NFs (F<sub>3</sub>) from G-NRs (R<sub>4</sub>) is controlled by YES logic ( $X_6$ ). The final circuit output is controlled by the three-input logic expression  $(X_4 \text{ AND } X_5) \text{ OR } X_6$ . In the first condition (1 AND 1) OR 1, the green intensity decrease from both R<sub>3</sub> and R<sub>4</sub>, showing the successful release of the G-NFs from each receptor. In the second condition (1 AND 1) OR 0, the decrease in green intensity is only observed in B-NRs. This result indicates the dissociation of R<sub>3</sub>-F<sub>2</sub> pairs are controlled by the AND logic operation. The bottom two conditions show no visible responses. See also movie S12.

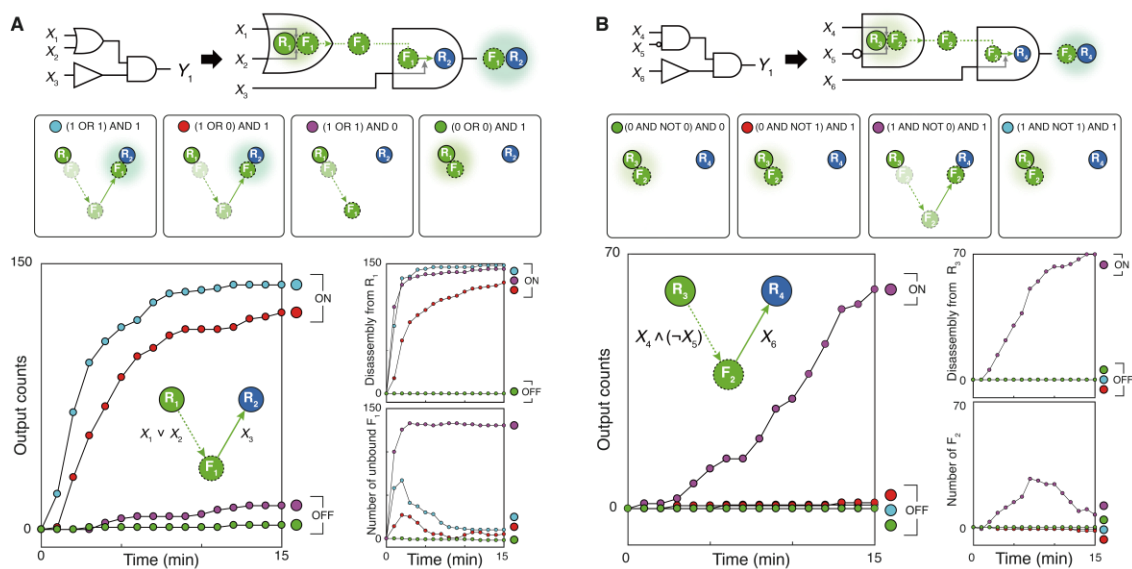

**Fig. S16. Two-layer OR-AND and INHIBIT-AND cascade circuits.** (A) Two-layer OR-AND cascade circuit. The network-level AND wiring scheme is applied to construct a nanoparticle circuit that performs  $(X_1 \text{ OR } X_2) \text{ AND } X_3$  logic operations. The circuit generates correct outputs that correspond to its logic, providing an ON/OFF level over 11-fold. The upstream Disassembly gate exhibited an ON/OFF level over 128-fold. As in the AND-AND cascade circuit shown in Fig. 4B, the population dynamics of G-NFs ( $F_1$ ) was estimated in the circuit. The analysis showed that the G-NFs released from G-NRs ( $R_1$ ) are bound to B-NRs ( $R_2$ ) only when the input  $X_3$  required for the assembly reaction is present. (B) Two-layer INHIBIT-AND cascade circuit. Disassembly reactions between G-NRs ( $R_3$ ) and G-NFs ( $F_2$ ) are controlled by  $(X_4 \text{ AND NOT } X_5)$  logic, and the subsequent assembly reactions of  $F_2$  with B-NRs ( $R_4$ ) are mediated by input  $X_6$ . Generation of  $F_2$ - $R_4$  dimers is thus controlled by  $(X_4 \text{ AND NOT } X_5) \text{ AND } X_6$  logic expression. The circuit carried out logic operations as designed, resulting in an ON/OFF level over 37-fold. The upstream INHIBIT gate provided an ON/OFF level over 70-fold. These results indicate that the released  $F_2$  are bound to B-NRs only in the presence of input  $X_6$ . DNA sequences and experimental conditions are listed in tables S2 and S3.

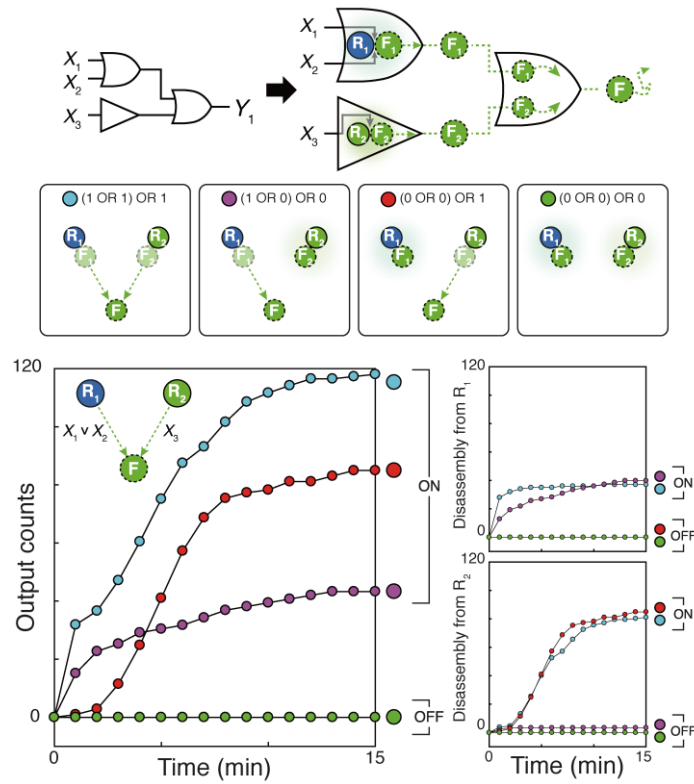

**Fig. S17. A two-layer OR-OR cascade circuit.** The network-level OR wiring scheme is applied to construct a nanoparticle circuit that performs  $(X_1 \text{ OR } X_2) \text{ OR } X_3$  logic operations. The circuit performs the computation as designed, resulting in an ON/OFF level over 43-fold. The upstream Disassembly OR gate and YES gate provided ON/OFF levels over 37-fold and 24-fold, respectively. DNA sequences and experimental conditions are listed in tables S2 and S3.

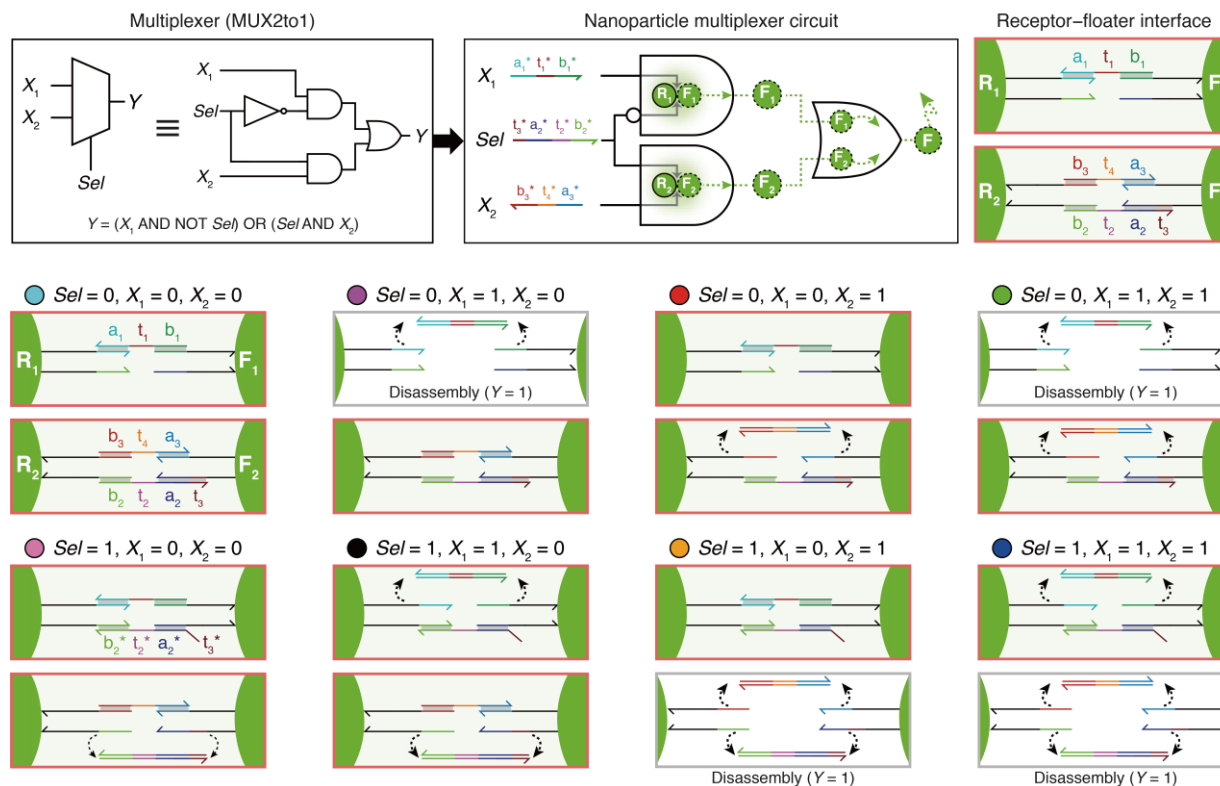

**Fig. S18. A nanoparticle multiplexer circuit.** A multiplexer circuit was constructed by wiring a two-input Disassembly INHIBIT gate ( $R_1$ – $F_1$ ) and a two-input Disassembly AND gate ( $R_2$ – $F_2$ ) with OR logic. The circuit takes three inputs  $X_1$ ,  $Sel$ , and  $X_2$  and releases G-NFs as outputs. The nanoparticle surface ligands were designed in a way that two different receptor–floater pairs could simultaneously process the Selector ( $Sel$ ) strands. In this design, spontaneous interactions between  $R_1$  and  $R_2$ , as well as those between  $F_1$  and  $F_2$  could occur. However, these undesirable interactions were prevented by loading the nanoparticle circuit components in a specific order and by introducing the protection strand  $a_2$ . Domain-level illustration of the circuit operations is provided. DNA sequences and experimental conditions are listed in tables S2 and S3. See also movie S13.

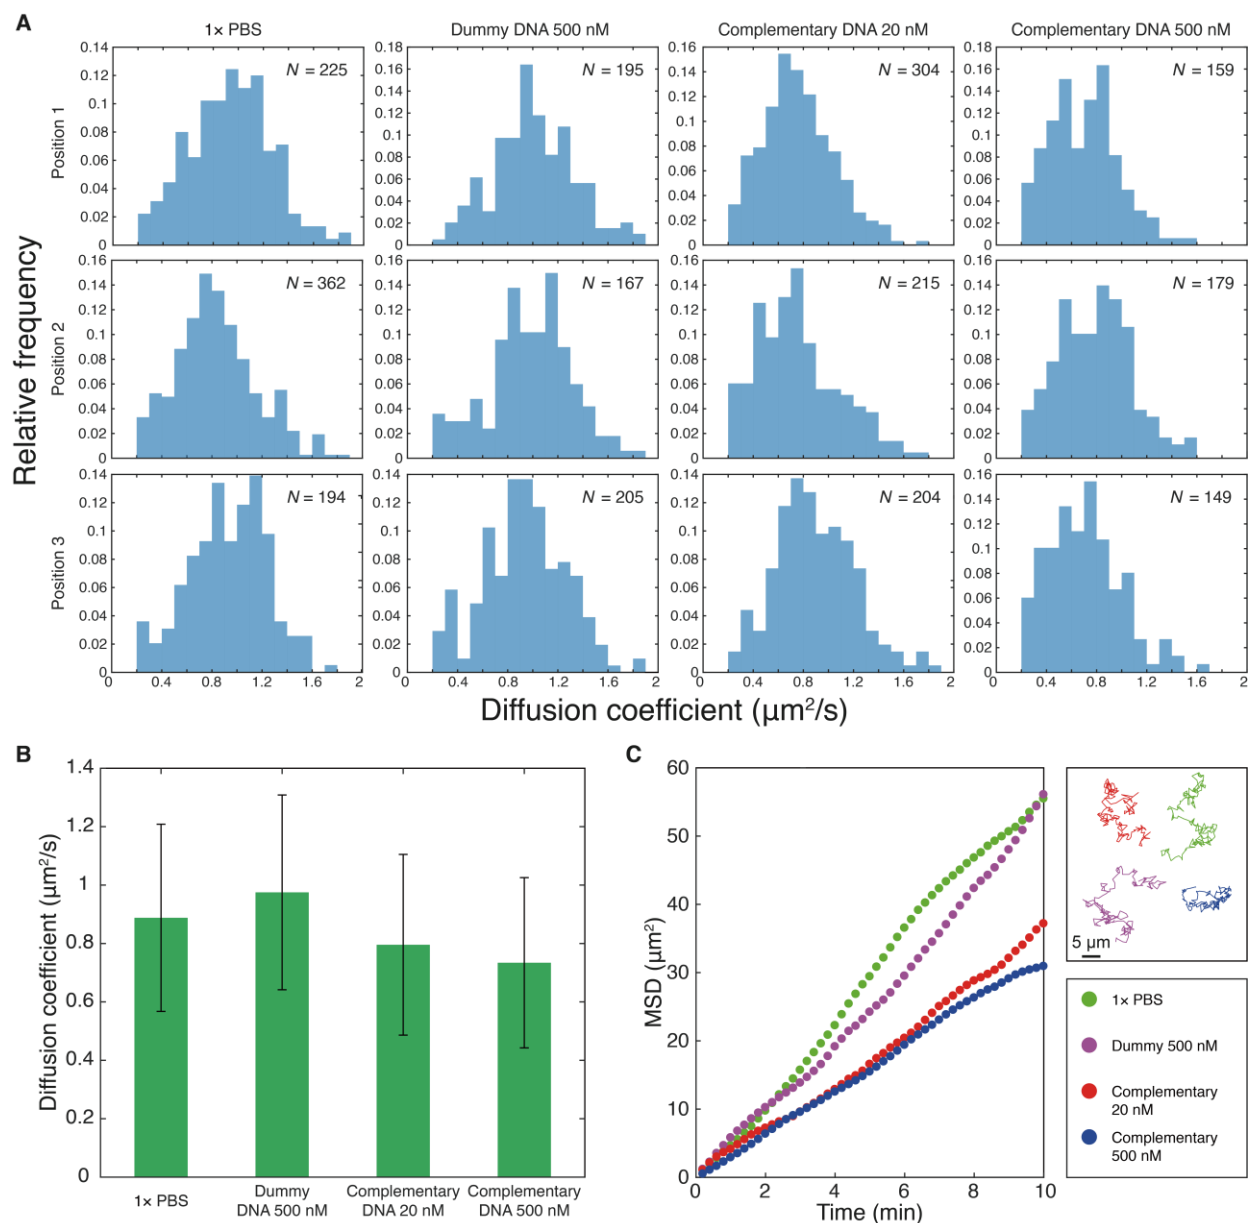

**Fig. S19. Effect of DNA concentration on floater diffusion.** Diffusions of G-NFs were analyzed in various contexts, such as in 1x PBS buffer, with a high concentration (500 nM) of “dummy” DNA, with a low concentration (20 nM) of complementary DNA inputs, and with a high concentration (500 nM) of complementary DNA inputs. There was no complementarity between the surface ligands of the G-NFs and the dummy DNA (5'- GTTTAAGATTTATG GTTAAGCGTA GATTAAGTATTAAG -3'). The G-NFs used in the Assembly YES gate were used for analysis. In each solution, the diffusions of the floater were analyzed in three different positions. **(A)** Histograms of diffusion coefficients of the G-NFs under each condition. **(B)** Diffusion coefficient of the G-NFs. Error bars indicate standard deviation of the diffusion coefficients in each condition. **(C)** MSD versus time plots of the four representative diffusion trajectories. The analysis showed that the overall diffusive behaviors of G-NFs are robust to the chemical environments of the solution.

**Table S1. Response rates of two-input logic gates.**

| Logic Circuit                  | Input condition |       |       |       |
|--------------------------------|-----------------|-------|-------|-------|
|                                | 00              | 01    | 10    | 11    |
| Two-input Assembly AND gate    | 2.80            | 7.78  | 17.74 | 84.31 |
| Two-input Assembly OR gate     | 0.817           | 76.90 | 71.66 | 79.22 |
| Two-input Disassembly AND gate | 0               | 0.90  | 0     | 83.46 |
| Two-input Disassembly OR gate  | 0               | 42.35 | 74.24 | 79.00 |

**Table S2. DNA sequences of thiolated strands used for functionalizing nanoparticles.** *r*: a surface density of a thiolated DNA strand. Spacer for linker and ligand with 5' thiol group: 5'-(CH<sub>2</sub>)<sub>6</sub>-A<sub>15</sub>-EG<sub>6</sub>-3'. Spacer for linker and ligand with 3' thiol group: 5'-EG<sub>6</sub>-A<sub>15</sub>-(CH<sub>2</sub>)<sub>3</sub>-3'.

**Figure 1**

| Logic Circuit        | NP       | Ligand                                         |              | Linker                                                             |              |
|----------------------|----------|------------------------------------------------|--------------|--------------------------------------------------------------------|--------------|
|                      |          | Sequence                                       | <i>r</i> (%) | Sequence                                                           | <i>r</i> (%) |
| Assembly YES gate    | R (G-NR) | 5'-CTATAAACTATTTTC<br>CTTTGCTATT-Spacer-SH -3' | 65           | 5'-biotin-CTCTCTGCCTCGTTC<br>AGACAAAACCTATCCTACT-<br>Spacer-SH -3' | 35           |
|                      | F (G-NF) | 5'-HS-Spacer-CGCAAAGACA<br>CTAATAACAAATTC -3'  | 99.5         | 5'-HS-Spacer-TTACTACACTG<br>TCACTGATCATCGCATGCTAT<br>AC-biotin -3' | 0.5          |
| Disassembly YES gate | R (G-NR) | 5'-CTATAAACTATTTTC<br>CTTTGCTATT-Spacer-SH -3' | 65           | 5'-biotin-CTCTCTGCCTCGTT<br>CAGACAAAACCTATCCTACT-<br>Spacer-SH -3' | 35           |
|                      | F (G-NF) | 5'-HS-Spacer-CGCAAAGACA<br>CTAATAACAAATTC -3'  | 99.5         | 5'-HS-Spacer-TTACTACACT<br>GTCAGTATCATCGCATGCTA<br>TAC-biotin -3'  | 0.5          |

**Figure 2**

| Logic Circuit                                 | NP                    | Ligand                                                                            |              | Linker                                                             |              |
|-----------------------------------------------|-----------------------|-----------------------------------------------------------------------------------|--------------|--------------------------------------------------------------------|--------------|
|                                               |                       | Sequence                                                                          | <i>r</i> (%) | Sequence                                                           | <i>r</i> (%) |
| Two-input Assembly AND gate                   | R <sub>1</sub> (G-NR) | 5'-HS-Spacer-ACTTCACAA<br>AGTGTACTTGTAGATTC<br>CAAATCTACTACAAGTAC<br>ACT TTG -3'  | 65           | 5'-HS-Spacer-TTACTACACT<br>GTCAGTATCATCGCATGCT<br>ATAC-biotin -3'  | 35           |
|                                               | F <sub>1</sub> (G-NF) | 5'-HS-Spacer-CTTCTAAAG<br>TACACTTTGTAGGATTTTC<br>CAACTAACCTACAAAGT<br>GTA CTT -3' | 65           | 5'-HS-Spacer-TTACTACACT<br>GTCAGTATCATCGCATGCT<br>ATAC-biotin -3'  | 0.5          |
|                                               |                       | 5'-HS-Spacer-TTACTACA<br>CTGTCACTGATCATCGCAT<br>GCTATAC -3'                       | 34.5         |                                                                    |              |
| Two-input Assembly OR gate                    | R <sub>2</sub> (G-NR) | 5'-CAAATAACTAATAC<br>ACATTCATCT-Spacer-SH -3'                                     | 32.5         | 5'-biotin-CTCTCTGCCTCGTT<br>CAGACAAAACCTATCCTACT<br>-Spacer-SH -3' | 35           |
|                                               |                       | 5'-CATAATCTATAATC<br>ATCCTCATAA-Spacer-SH -3'                                     | 32.5         |                                                                    |              |
|                                               | F <sub>2</sub> (B-NF) | 5'-HS-Spacer-TACTCACTAT<br>CTAAAAACAATTAC -3'                                     | 49.75        | 5'-HS-Spacer-TTACTACACT<br>GTCAGTATCATCGCATGCT<br>ATAC-biotin -3'  | 0.5          |
| 5'-HS-Spacer-CTTAGCCTAA<br>CATTTTCTAAATAC -3' | 49.75                 |                                                                                   |              |                                                                    |              |
| Two-input Disassembly AND gate                | R <sub>3</sub> (B-NR) | 5'-CAAATAACTAATAC<br>ACATTCATCT-Spacer-SH -3'                                     | 25           | 5'-biotin-CTCTCTGCCTCGTT<br>CAGACAAAACCTATCCTACT<br>-Spacer-SH -3' | 50           |
|                                               |                       | 5'-CATAATCTATAATC<br>ATCCTCATAA-Spacer-SH -3'                                     | 25           |                                                                    |              |
|                                               | F <sub>3</sub> (G-NF) | 5'-HS-Spacer-TACTCACTAT<br>CTAAAAACAATTAC -3'                                     | 49.75        | 5'-HS-Spacer-TTACTACACT<br>GTCAGTATCATCGCATGCT<br>ATAC-biotin -3'  | 0.5          |
| 5'-HS-Spacer-CTTAGCCTAA<br>CATTTTCTAAATAC -3' | 49.75                 |                                                                                   |              |                                                                    |              |



|                               |                          |                                                |      |                                                                     |     |
|-------------------------------|--------------------------|------------------------------------------------|------|---------------------------------------------------------------------|-----|
| Two-input Disassembly OR gate | R <sub>4</sub><br>(B-NR) | 5'-CTATAAACTATTTTC<br>CTTTGCTATT-Spacer-SH -3' | 50   | 5'-biotin-CTCTCTGCCTCGTT<br>CAGACAAAACATCATCCTACT<br>-Spacer-SH -3' | 50  |
|                               | F <sub>4</sub><br>(B-NF) | 5'-HS-Spacer-CGCAAAGA<br>CA CTAATAACAAATTC -3' | 99.5 | 5'-HS-Spacer-TTACTACA<br>CTGTCATGATCATCGCATG<br>CTATAC-biotin -3'   | 0.5 |

**Figure 3**

| Logic Circuit                                           | NP                       | Ligand                                         |              | Linker                                                              |              |
|---------------------------------------------------------|--------------------------|------------------------------------------------|--------------|---------------------------------------------------------------------|--------------|
|                                                         |                          | Sequence                                       | <i>r</i> (%) | Sequence                                                            | <i>r</i> (%) |
| Two-input Disassembly INHIBIT gate                      | R <sub>1</sub><br>(G-NR) | 5'-CAAATAACTAATAC<br>ACATTCATCT-Spacer-SH -3'  | 32.5         | 5'-biotin-CTCTCTGCCTCGTT<br>CAGACAAAACATCATCCTACT<br>-Spacer-SH -3' | 35           |
|                                                         |                          | 5'-CATAATCTATAATC<br>ATCCTCATAA-Spacer-SH -3'  | 32.5         |                                                                     |              |
|                                                         | F <sub>1</sub><br>(G-NF) | 5'-HS-Spacer-TACTCACTAT<br>CTAAAAACAATTAC -3'  | 49.75        | 5'-HS-Spacer-TTACTACACTG<br>TCACTGATCATCGCATGCTA<br>TAC-biotin -3'  | 0.5          |
|                                                         |                          | 5'-HS-Spacer-CTTAGCC TAA<br>CATTTTCTAAATAC -3' | 49.75        |                                                                     |              |
| Six-input Disassembly gate (fan-in)                     | R <sub>2</sub><br>(G-NR) | 5'-CTATAAACTATTTTC<br>CTTTGCTATT-Spacer-SH -3' | 22           | 5'-biotin-CTCTCTGCCTCGTT<br>CAGACAAAACATCATCCTACT<br>-Spacer-SH -3' | 34           |
|                                                         |                          | 5'-CAAATAACTAATAC<br>ACATTCATCT-Spacer-SH -3'  | 22           |                                                                     |              |
|                                                         |                          | 5'-CATAATCTATAATC<br>ATCCTCATAA-Spacer-SH -3'  | 22           |                                                                     |              |
|                                                         | F <sub>2</sub><br>(G-NF) | 5'-HS-Spacer-CGCAAAGA<br>CA CTAATAACAAATTC -3' | 33.2         | 5'-biotin-CTCTCTGCCTCGTT<br>CAGACAAAACATCATCCTACT<br>-Spacer-SH -3' | 0.4          |
|                                                         |                          | 5'-HS-Spacer-TACTCACTAT<br>CTAAAAACAATTAC -3'  | 33.2         |                                                                     |              |
|                                                         |                          | 5'-HS-Spacer-CTTAGCCTAA<br>CATTTTCTAAATAC -3'  | 33.2         |                                                                     |              |
| Two-input Disassembly Gate with three outputs (fan-out) | R <sub>3</sub><br>(G-NR) | 5'-CAAATAACTAATAC<br>ACATTCATCT-Spacer-SH -3'  | 32.5         | 5'-biotin-CTCTCTGCCTCGTT<br>CAGACAAAACATCATCCTACT<br>-Spacer-SH -3' | 35           |
|                                                         |                          | 5'-CATAATCTATAATC<br>ATCCTCATAA-Spacer-SH -3'  | 32.5         |                                                                     |              |
|                                                         | F <sub>3</sub><br>(R-NF) | 5'-HS-Spacer-TACTCACTAT<br>CTAAAAACAATTAC -3'  | 49.75        | 5'-HS-Spacer-TTACTACACTG<br>TCACTGATCATCGCATGCTA<br>TAC-biotin -3'  | 0.5          |
|                                                         |                          | 5'-HS-Spacer-CTTAGCCTAA<br>CATTTTCTAAATAC -3'  | 49.75        |                                                                     |              |
|                                                         | F <sub>4</sub><br>(G-NF) | 5'-HS-Spacer-TACTCACTAT<br>CTAAAAACAATTAC -3'  | 49.75        | 5'-HS-Spacer-TTACTACACTG<br>TCACTGATCATCGCATGCTA<br>TAC-biotin -3'  | 0.5          |
|                                                         |                          | 5'-HS-Spacer-CTTAGCCTAA<br>CATTTTCTAAATAC -3'  | 49.75        |                                                                     |              |
|                                                         | F <sub>5</sub><br>(B-NF) | 5'-HS-Spacer-TACTCACTAT<br>CTAAAAACAATTAC -3'  | 49.75        | 5'-HS-Spacer-TTACTACACTG<br>TCACTGATCATCGCATGCTA<br>TAC-biotin -3'  | 0.5          |
|                                                         |                          | 5'-HS-Spacer-CTTAGCCTAA<br>CATTTTCTAAATAC -3'  | 49.75        |                                                                     |              |

**Figure 4**

| Logic Circuit   | NP                       | Ligand                                         |              | Linker                                                              |              |
|-----------------|--------------------------|------------------------------------------------|--------------|---------------------------------------------------------------------|--------------|
|                 |                          | Sequence                                       | <i>r</i> (%) | Sequence                                                            | <i>r</i> (%) |
| AND-AND Cascade | R <sub>1</sub><br>(G-NR) | 5'-CAAATAACTAATAC<br>ACATTCATCT-Spacer-SH -3'  | 32.5         | 5'-biotin-CTCTCTGCCTCGTT<br>CAGACAAAACATCATCCTACT<br>-Spacer-SH -3' | 35           |
|                 |                          | 5'-CATAATCTATAATC<br>ATCCTCATAA-Spacer-SH -3'  | 32.5         |                                                                     |              |
|                 | F <sub>1</sub><br>(G-NF) | 5'-HS-Spacer-TACTCACTAT<br>CTAAAAACAATTAC -3'  | 33.2         | 5'-HS-Spacer-TTACTACACTG<br>TCACTGATCATCGCATGCTA<br>TAC-biotin -3'  | 0.4          |
|                 |                          | 5'-HS-Spacer-CTTAGCCTAA<br>CATTCTCTAAATAC -3'  | 33.2         |                                                                     |              |
|                 |                          | 5'-HS-Spacer-CGCAAAGACA<br>CTAATAACAAATTC -3'  | 33.2         |                                                                     |              |
|                 | R <sub>2</sub><br>(B-NR) | 5'-CTATAAACTATTTTC<br>CTTTGCTATT-Spacer-SH -3' | 50           | 5'-biotin-CTCTCTGCCTCGTT<br>CAGACAAAACATCATCCTACT<br>-Spacer-SH -3' | 50           |
| AND-OR Cascade  | R <sub>3</sub><br>(B-NR) | 5'-CATAATCTATAATC<br>ATCCTCATAA-Spacer-SH -3'  | 25           | 5'-biotin-CTCTCTGCCTCGTT<br>CAGACAAAACATCATCCTACT<br>-Spacer-SH -3' | 50           |
|                 |                          | 5'-CATTATCATATAAC<br>TCAACGTCAC-Spacer-SH -3'  | 25           |                                                                     |              |
|                 | F <sub>2</sub><br>(G-NF) | 5'-HS-Spacer-CTTAGCCTAA<br>CATTCTCTAAATAC -3'  | 49.75        | 5'-HS-Spacer-TTACTACACTG<br>TCACTGATCATCGCATGCTA<br>TAC-biotin -3'  | 0.5          |
|                 |                          | 5'-HS-Spacer-AATCAGC<br>ATCCTATTACATAATTC -3'  | 49.75        |                                                                     |              |
|                 | R <sub>4</sub><br>(G-NR) | 5'-CTATAAACTATTTTC<br>CTTTGCTATT-Spacer-SH -3' | 65           | 5'-biotin-CTCTCTGCCTCGTT<br>CAGACAAAACATCATCCTACT<br>-Spacer-SH -3' | 35           |
|                 | F <sub>3</sub><br>(G-NF) | 5'-HS-Spacer-CGCAAAGACA<br>CTAATAACAAATTC -3'  | 99.5         | 5'-HS-Spacer-TTACTACACTG<br>TCACTGATCATCGCATGCTA<br>TAC-biotin -3'  | 0.5          |

**Figure 5**

| Logic Circuit | NP                       | Ligand                                         |              | Linker                                                              |              |
|---------------|--------------------------|------------------------------------------------|--------------|---------------------------------------------------------------------|--------------|
|               |                          | Sequence                                       | <i>r</i> (%) | Sequence                                                            | <i>r</i> (%) |
| Multiplexer   | R <sub>1</sub><br>(B-NR) | 5'-HS-Spacer-CGCAAAGACA<br>CTAATAACAAATTC -3'  | 32.5         | 5'-HS-Spacer-TTACTACACTG<br>TCACTGATCATCGCATGCTA<br>TAC-biotin -3'  | 35           |
|               |                          | 5'-HS-Spacer-CTGCACATTA<br>GTATTAGTTATTTG      | 32.5         |                                                                     |              |
|               | F <sub>1</sub><br>(G-NF) | 5'-CTATAAACTATTTTC<br>CTTTGCTATT-Spacer-SH -3' | 49.75        | 5'-biotin-CTCTCTGCCTCGTT<br>CAGACAAAACATCATCCTACT<br>-Spacer-SH -3' | 0.5          |
|               |                          | 5'-GTAATTGTTTTTAG<br>TATTCTTCTC-Spacer-SH -3'  | 49.75        |                                                                     |              |
|               | R <sub>2</sub><br>(G-NR) | 5'-CAAATAACTAATAC<br>ACATTCATCT-Spacer-SH -3'  | 32.5         | 5'-biotin-CTCTCTGCCTCGTT<br>CAGACAAAACATCATCCTACT<br>-Spacer-SH -3' | 35           |
|               |                          | 5'-CATAATCTATAATC<br>ATCCTCATAA-Spacer-SH -3'  | 32.5         |                                                                     |              |
|               | F <sub>2</sub><br>(G-NF) | 5'-HS-Spacer-TACTCACTAT<br>CTAAAAACAATTAC -3'  | 49.75        | 5'-HS-Spacer-TTACTACACTG<br>TCACTGATCATCGCATGCTA<br>TAC-biotin -3'  | 0.5          |
|               |                          | 5'-HS-Spacer-CTTAGCCTAA<br>CATTCTCTAAATAC -3'  | 49.75        |                                                                     |              |

**Figure S10B**

| Logic Circuit               | NP                    | Ligand                                                                           |              | Linker                                                              |              |
|-----------------------------|-----------------------|----------------------------------------------------------------------------------|--------------|---------------------------------------------------------------------|--------------|
|                             |                       | Sequence                                                                         | <i>r</i> (%) | Sequence                                                            | <i>r</i> (%) |
| Two-input Assembly AND gate | R <sub>1</sub> (G-NR) | 5'-HS-Spacer-ACTTCACAA<br>AGTGTACTTGTAGATTC<br>CAAATCTACTACAAGTAC<br>ACT TTG -3' | 65           | 5'- HS-Spacer-TTACTACACTG<br>TCACTGATCATCGCATGCTA<br>TAC-biotin -3' | 35           |
|                             | F <sub>1</sub> (G-NF) | 5'-HS-Spacer-CTTCTAAAG<br>TACACTTTGTAGGATTC<br>CAACTAACCTACAAAGT<br>GTACTT -3'   | 49.75        | 5'- HS-Spacer-TTACTACACTG<br>TCACTGATCATCGCATGCTA<br>TAC-biotin -3' | 0.5          |
|                             |                       | 5'-HS-Spacer-CTTAGCCTAA<br>CATTTTCTAAATAC -3'                                    | 49.75        |                                                                     |              |

**Figure S10C**

| Logic Circuit               | NP                    | Ligand                                                                         |              | Linker                                                              |              |
|-----------------------------|-----------------------|--------------------------------------------------------------------------------|--------------|---------------------------------------------------------------------|--------------|
|                             |                       | Sequence                                                                       | <i>r</i> (%) | Sequence                                                            | <i>r</i> (%) |
| Two-input Assembly AND gate | R <sub>1</sub> (G-NR) | 5'-CATAATCTATAATC<br>ATCCTCATAA-Spacer-SH -3'                                  | 65           | 5'- biotin-CTCTCTGCCTCGTT<br>CAGACAAAACATCCTACT<br>-Spacer-SH -3'   | 35           |
|                             | F <sub>1</sub> (G-NF) | 5'- HS-Spacer-CTTCTAAAG<br>TACACTTTGTAGGATTC<br>AACTAACCTACAAAGTGT<br>ACTT -3' | 49.75        | 5'- HS-Spacer-TTACTACACTG<br>TCACTGATCATCGCATGCTA<br>TAC-biotin -3' | 0.5          |
|                             |                       | 5'- HS-Spacer-CTTAGCCTAA<br>CATTTTCTAAATAC -3'                                 | 49.75        |                                                                     |              |

**Figure S12. Dual-rail NAND**

| Dual-rail NAND                             | NP                    | Ligand                                          |              | Linker                                                              |              |
|--------------------------------------------|-----------------------|-------------------------------------------------|--------------|---------------------------------------------------------------------|--------------|
|                                            |                       | Sequence                                        | <i>r</i> (%) | Sequence                                                            | <i>r</i> (%) |
| Two-input Assembly OR (Y <sup>0</sup> )    | R <sub>1</sub> (B-NR) | 5'-CATAATCTATAATC<br>ATCCTCATAA-Spacer-SH -3'   | 25           | 5'- biotin-CTCTCTGCCTCGTT<br>CAGACAAAACATCCTACT<br>-Spacer-SH -3'   | 50           |
|                                            |                       | 5'-CATTATCATATAACTCA<br>ACGTCAC-Spacer-SH -3'   | 25           |                                                                     |              |
|                                            | F <sub>1</sub> (G-NF) | 5'- HS-Spacer-CTTAGCCTAA<br>CATTTTCTAAATAC -3'  | 49.75        | 5'- HS-Spacer-TTACTACACTG<br>TCACTGATCATCGCATGCTA<br>TAC-biotin -3' | 0.5          |
|                                            |                       | 5'-HS-Spacer-AATCAGCA<br>TCCTATTACATAATTC -3'   | 49.75        |                                                                     |              |
| Two-input Disassembly OR (Y <sup>1</sup> ) | R <sub>2</sub> (G-NR) | 5'-CTATAAACTATTTT<br>CTTTGCTATT-Spacer-SH -3'   | 32.5         | 5'- biotin-CTCTCTGCCTCGTT<br>CAGACAAAACATCCTACT<br>-Spacer-SH -3'   | 35           |
|                                            |                       | 5'-CAAATAACTAATAC<br>ACATTCATCT-Spacer-SH -3'   | 32.5         |                                                                     |              |
|                                            | F <sub>2</sub> (G-NF) | 5'- HS-Spacer-CGCAAAGAC<br>A CTAATAACAAATTC -3' | 49.75        | 5'- HS-Spacer-TTACTACACTG<br>TCACTGATCATCGCATGCTA<br>TAC-biotin -3' | 0.5          |
|                                            |                       | 5'- HS-Spacer-TACTCACTAT<br>CTAAAAACAATTAC -3'  | 49.75        |                                                                     |              |

**Figure S16A. OR-AND Cascade**

| Logic Circuit            | NP                                             | Ligand                                         |                                                                      | Linker                                                               |              |
|--------------------------|------------------------------------------------|------------------------------------------------|----------------------------------------------------------------------|----------------------------------------------------------------------|--------------|
|                          |                                                | Sequence                                       | <i>r</i> (%)                                                         | Sequence                                                             | <i>r</i> (%) |
| OR-AND Cascade           | R <sub>1</sub><br>(G-NR)                       | 5'-CATAATCTATAATC<br>ATCCTCATAA-Spacer-SH -3'  | 65                                                                   | 5'- biotin-CTCTCTGCCTCGTT<br>CAGACAAAACATCATCCTACT<br>-Spacer-SH -3' | 35           |
|                          | F <sub>1</sub><br>(G-NF)                       | 5'- HS-Spacer-CTTAGCCTAA<br>CATTTTCTAAATAC -3' | 49.75                                                                | 5'- HS-Spacer-TTACTACACTG<br>TCACTGATCATCGCATGCTA<br>TAC-biotin -3'  | 0.5          |
|                          |                                                | 5'-HS-Spacer-CGCAAAGA<br>CA CTAATAACAAATTC -3' | 49.75                                                                |                                                                      |              |
| R <sub>2</sub><br>(B-NR) | 5'-CTATAAACTATTTTC<br>CTTTGCTATT-Spacer-SH -3' | 50                                             | 5'- biotin-CTCTCTGCCTCGTT<br>CAGACAAAACATCATCCTACT<br>-Spacer-SH -3' | 50                                                                   |              |

**Figure S16B. INHIBIT-AND Cascade**

| Logic Circuit            | NP                                             | Ligand                                         |                                                                       | Linker                                                                |              |
|--------------------------|------------------------------------------------|------------------------------------------------|-----------------------------------------------------------------------|-----------------------------------------------------------------------|--------------|
|                          |                                                | Sequence                                       | <i>r</i> (%)                                                          | Sequence                                                              | <i>r</i> (%) |
| INHIBIT-AND Cascade      | R <sub>3</sub><br>(G-NR)                       | 5'-CAAATAACTAATAC<br>ACATTCATCT-Spacer-SH -3'  | 32.5                                                                  | 5'- biotin- CTCTCTGCCTCGTT<br>CAGACAAAACATCATCCTACT<br>-Spacer-SH -3' | 35           |
|                          |                                                | 5'-CATAATCTATAATC<br>ATCCTCATAA-Spacer-SH -3'  | 32.5                                                                  |                                                                       |              |
|                          | F <sub>2</sub><br>(G-NF)                       | 5'-HS-Spacer-TACTCACTAT<br>CTAAAACAATTAC -3'   | 33.2                                                                  | 5'- HS-Spacer-TTACTACACTG<br>TCACTGATCATCGCATGCTA<br>TAC-biotin -3'   | 0.4          |
|                          |                                                | 5'-HS-Spacer-CTTAGCCTAA<br>CATTTTCTAAATAC -3'  | 33.2                                                                  |                                                                       |              |
|                          |                                                | 5'-HS-Spacer-CGCAAAGA<br>CA CTAATAACAAATTC -3' | 33.2                                                                  |                                                                       |              |
| R <sub>4</sub><br>(B-NR) | 5'-CTATAAACTATTTTC<br>CTTTGCTATT-Spacer-SH -3' | 50                                             | 5'- biotin- CTCTCTGCCTCGTT<br>CAGACAAAACATCATCCTACT<br>-Spacer-SH -3' | 50                                                                    |              |

**Figure S17. OR-OR Cascade**

| Logic Circuit | NP                       | Ligand                                         |              | Linker                                                               |              |
|---------------|--------------------------|------------------------------------------------|--------------|----------------------------------------------------------------------|--------------|
|               |                          | Sequence                                       | <i>r</i> (%) | Sequence                                                             | <i>r</i> (%) |
| OR-OR Cascade | R <sub>1</sub><br>(B-NR) | 5'-CATAATCTATAATC<br>ATCCTCATAA-Spacer-SH -3'  | 50           | 5'- biotin-CTCTCTGCCTCGTT<br>CAGACAAAACATCATCCTACT<br>-Spacer-SH -3' | 50           |
|               | F <sub>1</sub><br>(G-NF) | 5'-HS-Spacer-CTTAGCCTAA<br>CATTTTCTAAATAC -3'  | 99.5         | 5'- HS-Spacer-TTACTACACTG<br>TCACTGATCATCGCATGCTA<br>TAC-biotin -3'  | 0.5          |
|               | R <sub>2</sub><br>(G-NR) | 5'-CATTATCATATAAC TCA<br>ACGTCAC-Spacer-SH -3' | 65           | 5'- biotin-CTCTCTGCCTCGTT<br>CAGACAAAACATCATCCTACT<br>-Spacer-SH -3' | 35           |
|               | F <sub>2</sub><br>(G-NF) | 5'-HS-Spacer-AATCAGC ATC<br>CTATTACATAATTC -3' | 99.5         | 5'- HS-Spacer-TTACTACACTG<br>TCACTGATCATCGCATGCTA<br>TAC-biotin -3'  | 0.5          |

**Table S3. DNA sequences and experimental conditions used in circuit operations.** Sequences are written in a 5' → 3' direction.

**Figure 1**

| Logic Circuit        | Input |                                                |                   | Pre-dimerization                               |                  |
|----------------------|-------|------------------------------------------------|-------------------|------------------------------------------------|------------------|
|                      | Name  | Sequence                                       | Condition         | Sequence                                       | Condition        |
| Assembly YES gate    | $X_a$ | GAAATAGTTTATAG<br>CTGCGACTGT<br>GAATTTGTTATTAG | 20 nM,<br>15 min  | N/A                                            |                  |
| Disassembly YES gate | $X_d$ | CTAATAACAAATTC<br>ACAGTCGCAG<br>CTATAAACTATTC  | 500 nM,<br>15 min | GAAATAGTTTATAG<br>CTGCGACTGT<br>GAATTTGTTATTAG | 10 nM,<br>15 min |

**Figure 2**

| Logic Circuit                  | Input                   |                                                |                   | Pre-dimerization                                             |                  |
|--------------------------------|-------------------------|------------------------------------------------|-------------------|--------------------------------------------------------------|------------------|
|                                | Name                    | Sequence                                       | Condition         | Sequence                                                     | Condition        |
| Two-input Assembly AND gate    | $X_1$                   | AGTTGGAAAT<br>CCTACAAAGTGTA                    | 100 nM,<br>30 min | N/A                                                          |                  |
|                                | $X_2$                   | GATTTGGAAT<br>CTACAAGTACACT                    | 100 nM,<br>30 min |                                                              |                  |
|                                | $X_{ext}$<br>(Fig. S10) | GATTATAGATTATG<br>TGTTAGCTGTGTA<br>TTTAGAAAATG | 10 nM             |                                                              |                  |
| Two-input Assembly OR gate     | $X_3$                   | GTATTAGTTATTTG<br>TAGACGTAGG<br>GTAATTGTTTTAG  | 40 nM,<br>20 min  | N/A                                                          |                  |
|                                | $X_4$                   | GATTATAGATTATG<br>TGTTAGCTGTGTA<br>TTTAGAAAATG | 40 nM,<br>20 min  |                                                              |                  |
| Two-input Disassembly AND gate | $X_5$                   | CTAAAAACAATTAC<br>CCTACGTCTACAA<br>ATAACTAATAC | 500 nM,<br>15 min | GTATTAGTTATTTG<br>TAGACGTAGGGT<br>AATTGTTTTAG                | 40 nM,<br>15 min |
|                                | $X_6$                   | CATTTTCTAAATAC<br>ACAGCTAACACAT<br>AATCTATAATC | 500 nM,<br>15 min | GATTATAGATTATG<br>TGTTAGCTGTGTA<br>TTTAGAAAATG               | 40 nM,<br>15 min |
| Two-input Disassembly OR gate  | $X_7$                   | CTAATAACAAATTC<br>CTCACGAACT                   | 500 nM,<br>15 min | GAAATAGTTTATAG<br>CTGCGACTGTAGT<br>TCGTGAGGAATTT<br>GTTATTAG | 10 nM,<br>15 min |
|                                | $X_8$                   | ACAGTCGCAG<br>CTATAAACTATTC                    | 500 nM,<br>15 min |                                                              |                  |

**Figure 3**

| Logic Circuit                                                    | Input    |                                                |                   | Pre-dimerization                                              |                  |
|------------------------------------------------------------------|----------|------------------------------------------------|-------------------|---------------------------------------------------------------|------------------|
|                                                                  | Name     | Sequence                                       | Condition         | Sequence                                                      | Condition        |
| Two-input<br>Disassembly<br>INHIBIT gate                         | $X_1$    | CTAAAAACAATTAC<br>CCTACGTCTA<br>CAAATAACTAATAC | 200 nM,<br>15 min | GTATTAGTTATTTG<br>TAGACGTAGG<br>GTAATTGTTTTTATG               | 10 nM,<br>15 min |
|                                                                  | $X_2$    | GATTATAGATTATG<br>TGTTAGCTGT<br>GTATTAGAAAATG  | 100 nM,<br>15 min |                                                               |                  |
| Six-input<br>Disassembly<br>gate (fan-in)                        | $X_3$    | CTAATAACAAATTC<br>CTCACGAACT                   | 200 nM,<br>15 min | GAAATAGTTTATAG<br>CTGCGACTGT<br>AGTTTCGTGAG<br>GAATTTGTTATTAG | 20 nM,<br>15 min |
|                                                                  | $X_4$    | ACAGTCGCAG<br>CTATAAACTATTTTC                  | 200 nM,<br>15 min |                                                               |                  |
|                                                                  | $X_5$    | CTAAAAACAATTAC<br>CCTACGTCTA                   | 200 nM,<br>15 min | GTATTAGTTATTTG<br>GAAGTGTATT<br>TAGACGTAGG<br>GTAATTGTTTTTATG | 20 nM,<br>15 min |
|                                                                  | $X_6$    | AATACACTTC<br>CAAATAACTAATAC                   | 200 nM,<br>15 min |                                                               |                  |
|                                                                  | $X_7$    | CATTTTCTAAATAC<br>ACAGCTAACA                   | 200 nM,<br>15 min | GATTATAGATTATG<br>TGGGATCTGT<br>TGTTAGCTGT<br>GTATTAGAAAATG   | 20 nM,<br>15 min |
|                                                                  | $X_8$    | ACAGATCCCA<br>CATAATCTATAATC                   | 200 nM,<br>15 min |                                                               |                  |
| Two-input<br>Disassembly<br>Gate with three<br>outputs (fan-out) | $X_9$    | CTAAAAACAATTAC<br>CCTACGTCTA<br>CAAATAACTAATAC | 500 nM,<br>15 min | GTATTAGTTATTTG<br>TAGACGTAGG<br>GTAATTGTTTTTATG               | 40 nM,<br>15 min |
|                                                                  | $X_{10}$ | CATTTTCTAAATAC<br>ACAGCTAACA<br>CATAATCTATAATC | 500 nM,<br>15 min | GATTATAGATTATG<br>TGTTAGCTGT<br>GTATTAGAAAATG                 | 40 nM,<br>15 min |

**Figure 4**

| Logic Circuit                                          | Input |                                                |                   | Pre-dimerization                               |                  |
|--------------------------------------------------------|-------|------------------------------------------------|-------------------|------------------------------------------------|------------------|
|                                                        | Name  | Sequence                                       | Condition         | Sequence                                       | Condition        |
| AND-AND<br>Cascade<br>( $X_1$ AND $X_2$ )<br>AND $X_3$ | $X_1$ | CTAAAAACAATTAC<br>CCTACGTCTA<br>CAAATAACTAATAC | 500 nM,<br>30 min | GTATTAGTTATTTG<br>TAGACGTAGG<br>GTAATTGTTTTTAG | 40 nM,<br>15 min |
|                                                        | $X_2$ | CATTTTCTAAATAC<br>ACAGCTAACA<br>CATAATCTATAATC | 500 nM,<br>30 min | GATTATAGATTATG<br>TGTTAGCTGT<br>GTATTTAGAAAATG | 40 nM,<br>15 min |
|                                                        | $X_3$ | GAAATAGTTTATAG<br>CTGCGACTGT<br>GAATTTGTTATTAG | 100 nM,<br>30 min | N/A                                            |                  |
| AND-OR<br>Cascade<br>( $X_4$ AND $X_5$ )<br>OR $X_6$   | $X_4$ | CATTTTCTAAATAC<br>ACAGCTAACA<br>CATAATCTATAATC | 500 nM,<br>15 min | GATTATAGATTATG<br>TGTTAGCTGT<br>GTATTTAGAAAATG | 40 nM,<br>15 min |
|                                                        | $X_5$ | CTATTACATAATTC<br>TGCATTCTTC<br>CATTATCATATAAC | 500 nM,<br>15 min | GTTATATGATAATG<br>GAAGAATGCA<br>GAATTATGTAATAG | 40 nM,<br>15 min |
|                                                        | $X_6$ | CTAATAACAAATTC<br>ACAGTCGCAG<br>CTATAAACTATTC  | 500 nM,<br>15 min | GAAATAGTTTATAG<br>CTGCGACTGT<br>GAATTTGTTATTAG | 10 nM,<br>15 min |

**Figure 5**

| Logic Circuit | Input           |                                                              |                   | Pre-dimerization                                                            |                  |
|---------------|-----------------|--------------------------------------------------------------|-------------------|-----------------------------------------------------------------------------|------------------|
|               | Name            | Sequence                                                     | Condition         | Sequence                                                                    | Condition        |
| Multiplexer   | $X_1$           | CTAATAACAAATTC<br>ACAGTCGCAG<br>CTATAAACTATTC                | 200 nM,<br>15 min | GAAATAGTTTATAG<br>CTGCGACTGT<br>GAATTTGTTATTAG                              | 10 nM,<br>15 min |
|               | $X_2$           | CATTTTCTAAATAC<br>ACAGCTAACA<br>CATAATCTATAATC               | 500 nM,<br>15 min | GATTATAGATTATG<br>TGTTAGCTGT<br>GTATTTAGAAAATG                              | 40 nM,<br>15 min |
|               | <i>Selector</i> | TACTCACTAT<br>CTAAAAACAATTAC<br>CCTACGTCTA<br>CAAATAACTAATAC | 500 nM,<br>15 min | GTATTAGTTATTTG<br>TAGACGTAGG<br>GTAATTGTTTTAG<br>ATAGTGAGTA ( <i>Sel*</i> ) | 40 nM,<br>15 min |
|               |                 |                                                              |                   | GTAATTGTTTTAG<br>( $F_2$ protection)                                        | 20 nM,<br>15 min |

**Figure S10**

| Logic Circuit          | Input                           |                                                 |                | Pre-dimerization |           |
|------------------------|---------------------------------|-------------------------------------------------|----------------|------------------|-----------|
|                        | Name                            | Sequence                                        | Condition      | Sequence         | Condition |
| Two-input Assembly AND | $X_1$                           | AGTTGGAAATCCT<br>ACAAAGTGTA                     | 100 nM, 15 min | N/A              |           |
|                        | $X_2$                           | GATTGGAAATCTAC<br>AAGTACACT                     | 100 nM, 15 min |                  |           |
|                        | $X_3$<br>(Simple hybridization) | GATTATAGATTATG<br>TGTTAGCTGT GTAT<br>TTAGAAAATG | 10 nM 15 min   |                  |           |

**Figure S12. A dual-rail NAND gate.**

| Dual-rail NAND                     | Operation (input) |                                                |                   | Pre-dimerization                               |               |
|------------------------------------|-------------------|------------------------------------------------|-------------------|------------------------------------------------|---------------|
|                                    | Name              | Sequence                                       | Condition         | Sequence                                       | Condition     |
| Two-input Assembly OR ( $Y^0$ )    | $X_1^1$           | GATTATAGATTATG<br>TGTTAGCTGT<br>GTATTTAGAAAATG | 50 nM,<br>10 min  | N/A                                            |               |
|                                    | $X_2^1$           | GTTATATGATAATG<br>GAAGAATGCA<br>GAATTATGTAATAG | 50 nM,<br>10 min  |                                                |               |
| Two-input Disassembly OR ( $Y^1$ ) | $X_1^0$           | CTAATAACAAATTC<br>ACAGTCGCAG<br>CTATAAACTATTTC | 500 nM,<br>10 min | GAAATAGTTTATAG<br>CTGCGACTGT<br>GAATTTGTTATTAG | 40 nM, 15 min |
|                                    | $X_2^0$           | CTAAAAACAATTAC<br>CCTACGTCTA<br>CAAATAACTAATAC | 500 nM,<br>10 min | GTATTAGTTATTTG<br>TAGACGTAGG<br>GTAATTTGTTTTAG | 40 nM, 15 min |

**Figure S16A. OR-AND Cascade.**

| Logic Circuit                                     | Input |                                                |                   | Pre-dimerization                                             |                  |
|---------------------------------------------------|-------|------------------------------------------------|-------------------|--------------------------------------------------------------|------------------|
|                                                   | Name  | Sequence                                       | Condition         | Sequence                                                     | Condition        |
| OR-AND Cascade<br>( $X_1$ OR $X_2$ )<br>AND $X_3$ | $X_1$ | CATTTTCTAAATAC<br>ACAGCTAACA                   | 500 nM,<br>15 min | GATTATAGATTATG<br>TGGGATCTGT<br>TGTTAGCTGT<br>GTATTTAGAAAATG | 10 nM,<br>15 min |
|                                                   | $X_2$ | ACAGATCCCA<br>CATAATCTATAATC                   | 500 nM,<br>15 min |                                                              |                  |
|                                                   | $X_3$ | GAAATAGTTTATAG<br>CTGCGACTGT<br>GAATTTGTTATTAG | 100 nM,<br>15 min | N/A                                                          |                  |



**Figure S16B. INHIBIT-AND Cascade**

| Logic Circuit                                            | Input |                                                |                   | Pre-dimerization                               |               |
|----------------------------------------------------------|-------|------------------------------------------------|-------------------|------------------------------------------------|---------------|
|                                                          | Name  | Sequence                                       | Condition         | Sequence                                       | Condition     |
| INHIBIT-AND Cascade<br>( $X_4$ AND NOT $X_5$ ) AND $X_6$ | $X_4$ | CTAAAAACAATTAC<br>CCTACGTCTA<br>CAAATAACTAATAC | 200 nM,<br>15 min | GTATTAGTTATTTG<br>TAGACGTAGG<br>GTAATTGTTTTTAG | 10 nM, 30 min |
|                                                          | $X_5$ | GATTATAGATTATG<br>TGTTAGCTGT<br>GTATTTAGAAAATG | 100 nM,<br>15 min | N/A                                            |               |
|                                                          | $X_6$ | GAAATAGTTTATAG<br>CTGCGACTGT<br>GAATTTGTTATTAG | 100 nM,<br>15 min |                                                |               |

**Figure S17. OR-OR Cascade**

| Logic Circuit                                | Input |                                               |                   | Pre-dimerization                                             |               |
|----------------------------------------------|-------|-----------------------------------------------|-------------------|--------------------------------------------------------------|---------------|
|                                              | Name  | Sequence                                      | Condition         | Sequence                                                     | Condition     |
| OR-OR Cascade<br>( $X_1$ OR $X_2$ ) OR $X_3$ | $X_1$ | CATTTTCTAAATAC<br>ACAGCTAACA                  | 500 nM,<br>15 min | GATTATAGATTATG<br>TGGGATCTGT<br>TGTTAGCTGT<br>GTATTTAGAAAATG | 10 nM, 15 min |
|                                              | $X_2$ | ACAGATCCCA<br>CATAATCTATAATC                  | 500 nM,<br>15 min |                                                              |               |
|                                              | $X_3$ | CTATTACATAATTC<br>TGCATTCTC<br>CATTATCATATAAC | 500 nM,<br>15 min | GTTATATGATAATG<br>GAAGAATGCA<br>GAATTATGTAATAG               | 10 nM, 15 min |

**Movie S1. Time-lapse dark-field imaging of a nanoparticle Assembly YES gate.**

A nanoparticle Assembly YES gate consists of a G-NF and a G-NR. In the presence of a DNA input ( $X_a$  in Fig. 1C) that forms a DNA bond at the receptor–floater interface via DNA hybridization (Input = “1”), a mobile G-NF binds to an immobile G-NR and forms a dimer. The assembly reaction results in an increase of green intensity of the G-NR scattering signal, which indicates a discrete switching of the G-NF from monomer state to dimer state (Output = “1”). G-NRs that generate outputs with G-NFs are marked with white circles before assembly and with yellow circles after assembly. The time-lapse video was recorded for 15 min after input addition. The input-induced assembly process is shown at the population level in the first part (0 s to 12 s). Real-time signal trace of a single-particle Assembly YES gate (chosen from the population-level imaging data) is shown in the second part (12 s to 24 s). Recording frame rate: 0.4 f.p.s. Playback at 30 f.p.s.

**Movie S2. Time-lapse dark-field imaging of a nanoparticle Disassembly YES gate.**

A nanoparticle Disassembly YES gate consists of a G-NR and a G-NF. Prior to input addition, G-NRs and G-NFs are assembled to form dimers by a single-stranded DNA strand ( $X_d^*$  in Fig. 1C) that exposes a toehold domain ( $t_2$  in Fig. 1C). The dimerization process was recorded by the dark-field time-lapse imaging at the population level for 15 min and is shown in the movie for the first 12 seconds. G-NRs that bind to G-NFs are indicated with white circles before assembly and with red circles after assembly. In the presence of a DNA input ( $X_d$  in Fig. 1C) that removes the preformed DNA bond  $X_d^*$  via strand displacement (Input = “1”), the trapped G-NFs are released from G-NRs. The disassembly event results in a decrease of green intensity of the G-NR scattering signal, which indicates a discrete switching of the G-NF from dimer state to monomer state (Output = “1”). The released G-NFs are highly mobile. This disassembly process was recorded by the dark-field time-lapse imaging at the population level for the subsequent 15 min after input addition and is shown in the movie for the second part (12 s to 24 s). Real-time signal trace of a single-particle Disassembly YES gate (chosen from the population-level imaging data) is also shown in the third part of the movie (24 s to 36 s). Both pre-dimerization and disassembly processes were carried out in a fixed position. The G-NRs that release G-NFs are indicated with red circles before disassembly and gray circles after disassembly. Recording frame rate: 0.4 f.p.s. Playback at 30 f.p.s.

**Movie S3. Receptor-only visualization of a dark-field movie.**

A raw video (left) and the reconstructed video (right) with a small field-of-view ( $16 \times 16 \mu\text{m}^2$ ) time-lapse image are shown. The time-lapse imaging was conducted in high-speed (recording duration: 48 s; recording frame rate: 5 f.p.s.; playback at 30 f.p.s.) to image three mobile floater nanoparticles (R-NFs, G-NFs, B-NFs) and three immobile receptor nanoparticles (R-NRs, G-NRs, B-NRs) loaded with high density ( $\sim 500$  floaters and  $\sim 6,000$  receptors in  $128 \times 128 \mu\text{m}^2$ ). The receptor-only image sequence was generated based on the signals of receptor nanoparticles identified by the single-particle tracking algorithm described in fig. S6. No DNA inputs were added. Receptor signals are fluctuating, primarily due to the transient overlaps by mobile floaters by passing in close proximity.

**Movie S4. Time-lapse dark-field imaging of a two-input Assembly AND gate.**

A two-input Assembly AND gate ( $X_1$  AND  $X_2$ ) consists of a G-NR ( $R_1$  in Fig. 2A) and a G-NF ( $F_1$  in Fig. 2A). Only when the two types of DNA inputs are both present in solution (1 AND 1), a mobile G-NF binds to an immobile G-NR and forms a dimer via DNA hybridization. The assembly reaction results in a step-function-like increase of green intensity of the G-NR scattering signal. Mobile G-NFs do not bind to G-NRs in other FALSE conditions (0 AND 0, 1 AND 0, 0 AND 1). G-NRs that assemble with G-NFs are indicated with white circles before assembly and with yellow circles after assembly. Each time-lapse video was recorded for 30 min after input addition. The raw videos are followed by reconstructed videos showing only G-NR signals. The first and last frames of the reconstructed movies are included in the second column of Fig. 2A. Recording frame rate: 0.4 f.p.s. Playback at 30 f.p.s.

**Movie S5. Time-lapse dark-field imaging of a two-input Assembly OR gate.**

A two-input Assembly OR gate ( $X_3$  OR  $X_4$ ) consists of a G-NR ( $R_2$  in Fig. 2B) and a B-NF ( $F_2$  in Fig. 2B). When either of two DNA inputs is present in solution (1 OR 0, 0 OR 1, 1 OR 1), a mobile B-NF binds to an immobile G-NR and forms a dimer via DNA hybridization. Mobile B-NFs do not bind to G-NRs in 0 OR 0 condition. G-NRs that assemble with B-NFs are indicated with white circles before assembly and with yellow circles after assembly. Each time-lapse video was recorded for 20 min after input addition. The raw videos are followed by reconstructed videos showing only G-NR signals. The first and last frames of the reconstructed movies are included in the second column of Fig. 2B. Recording frame rate: 0.4 f.p.s. Playback at 30 f.p.s.

**Movie S6. Time-lapse dark-field imaging of a two-input Disassembly AND gate.**

A two-input Disassembly AND gate ( $X_5$  AND  $X_6$ ) consists of a B-NR ( $R_3$  in Fig. 2C) and a G-NF ( $F_3$  in Fig. 2C). B-NRs and G-NFs are assembled to form dimers by two distinct DNA bonds (each exposing a unique toehold domain) in the pre-dimerization step prior to the input addition. Only when the two types of DNA inputs are both present in solution (1 AND 1), the two DNA bonds can be removed by strand displacement. The bond removal results in the release of G-NFs from B-NRs. The released G-NFs are highly mobile. The disassembly event does not occur in other FALSE conditions (0 AND 0, 1 AND 0, 0 AND 1). B-NRs that release G-NFs as outputs are indicated with red circles before disassembly and with gray circles after disassembly. Each time-lapse video was recorded for 15 min after input addition. The raw videos are followed by reconstructed videos showing only B-NR signals. The first and last frames of the reconstructed movies are included in the second column of Fig. 2C. Recording frame rate: 0.4 f.p.s. Playback at 30 f.p.s.

**Movie S7. Time-lapse dark-field imaging of a two-input Disassembly OR gate.**

A two-input Disassembly OR gate ( $X_7$  OR  $X_8$ ) consists of a B-NR ( $R_4$  in Fig. 2D) and a B-NF ( $F_4$  in Fig. 2D). B-NRs and B-NFs are assembled to form dimers by a DNA bond that exposes two distinct toehold domains in the pre-dimerization step prior to the input addition. When either of the two inputs is present in solution (1 OR 0, 0 OR 1, 1 OR 1), the DNA bond at the receptor–floater interface can be cleaved by strand displacement. The bond cleavage results in the release of B-NFs from B-NRs. The released B-NFs are highly mobile. The disassembly event does not occur in the condition 0 OR 0. B-NRs that release B-NFs as outputs are indicated with red circles before disassembly and with gray circles after disassembly. Each time-lapse video was recorded for 15 min after input addition. The raw videos are followed by reconstructed videos showing only B-NR signals. The first and last frames of the reconstructed movies are included in the second column of Fig. 2D. Recording frame rate: 0.4 f.p.s. Playback at 30 f.p.s.

**Movie S8. Time-lapse dark-field imaging of a two-input Disassembly INHIBIT gate.**

A two-input Disassembly INHIBIT gate ( $X_1$  AND NOT  $X_2$ ) consists of a G-NR ( $R_1$  in Fig. 3A) and a G-NF ( $F_1$  in Fig. 3A). G-NRs that release G-NFs as outputs are indicated with red circles before disassembly and with gray circles after disassembly. Each time-lapse video was recorded for 15 min after input addition. Recording frame rate: 0.4 f.p.s. Playback at 30 f.p.s.

**Movie S9. Time-lapse dark-field imaging of a six-input Disassembly gate.**

A circuit with an AND gate with fan-in from three OR gates [ $(X_3$  OR  $X_4$ ) AND  $(X_5$  OR  $X_6$ ) AND  $(X_7$  OR  $X_8)$ ] consists of a G-NR ( $R_2$  in Fig. 3B) and G-NF ( $F_2$  in Fig. 3B). G-NRs that release G-NFs as outputs are indicated with red circles before disassembly and with gray circles after disassembly. Each time-lapse video was recorded for 15 min after input addition. Recording frame rate: 0.4 f.p.s. Playback at 30 f.p.s.

**Movie S10. Time-lapse dark-field imaging of a two-input Disassembly AND gate with three outputs.**

A circuit with an AND gate ( $X_9$  AND  $X_{10}$ ) with fan-out to three YES gates consists of G-NR ( $R_3$  in Fig. 3C), an R-NF ( $F_3$  in Fig. 3C), a G-NF ( $F_4$  in Fig. 3C), and a B-NF ( $F_5$  in Fig. 3C). G-NRs that release floaters as outputs are

indicated with red circles before disassembly and with gray circles after disassembly. Each time-lapse video was recorded for 15 min after input addition. Recording frame rate: 0.4 f.p.s. Playback at 30 f.p.s.

**Movie S11. Time-lapse dark-field imaging of a two-layer AND-AND cascade circuit.**

A two-layer AND-AND cascade circuit  $[(X_1 \text{ AND } X_2) \text{ AND } X_3]$  consists of a G-NR ( $R_1$  in Fig. 4B), a B-NR ( $R_2$  in Fig. 4B), and a G-NF ( $F_1$  in Fig. 4B). G-NRs that release G-NFs as outputs are indicated with red circles before disassembly and with gray circles after disassembly. B-NRs that generate the final outputs with the released G-NFs are indicated with white circles before assembly and with yellow circles after assembly. Each time-lapse video was recorded for 30 min after input addition. Recording frame rate: 0.4 f.p.s. Playback at 30 f.p.s.

**Movie S12. Time-lapse dark-field imaging of a two-layer AND-OR cascade circuit.**

A two-layer AND-OR cascade circuit  $[(X_4 \text{ AND } X_5) \text{ OR } X_6]$  consists of a B-NR ( $R_3$  in Fig. 4C), a G-NR ( $R_4$  in Fig. 4C), and G-NFs ( $F_2$  and  $F_3$  in Fig. 4C). Receptors that release G-NFs as outputs are indicated with red circles before disassembly and with gray circles after disassembly. Each time-lapse video was recorded for 15 min after input addition. Recording frame rate: 0.4 f.p.s. Playback at 30 f.p.s.

**Movie S13. Time-lapse dark-field imaging of a nanoparticle multiplexer circuit.**

A multiplexer circuit  $[(X_1 \text{ AND NOT } Sel) \text{ OR } (Sel \text{ AND } X_2)]$  consists of G-NRs ( $R_1$  and  $R_2$  in Fig. 5) and G-NFs ( $F_1$  and  $F_2$  in Fig. 5). G-NRs that release G-NFs as outputs are indicated with red circles before disassembly and with gray circles after disassembly. Each time-lapse video was recorded for 15 min after input addition. The raw videos of the multiplexer responding to eight input combinations are followed by reconstructed videos showing only the signal response of receptors. Recording frame rate: 0.4 f.p.s. Playback at 20 f.p.s.
